# Supplementary material for: Interactions by 2D Gel Electrophoresis Overlap (iGEO): a novel high fidelity approach to identify constituents of protein complexes
Source: PubMed Central journal article supplement (PMC3688448; doi:10.1186/1477-5956-11-21), 2013-05-12
Supplement: 1477-5956-11-21-S7.pdf [file 1477-5956-11-21-S7.pdf]

# **MASCOT** SCIENCE Mascot Search Results

User : Julie Kadrmas; gel band: #38  
 Email : 110223FT\_JulieKadrmas\_38  
 Search title : NCBI Drosophila DB trypsin specific search: Oxidation (MHW)  
 MS data file : C:\Documents and Settings\cnelson\Desktop\Merge Files\_2011\February\_2011\merge\_110223FT\_JulieKad  
 Database : NCBIInr (5335292 sequences; 1845185051 residues)  
 Taxonomy : Drosophila (fruit flies) (50248 sequences)  
 Timestamp : 24 Feb 2011 at 19:10:11 GMT  
 Protein hits : [gi|18860063](#) Rpt3 CG16916-PA [Drosophila melanogaster]  
               [gi|3426089](#) polyprotein [Drosophila melanogaster]  
               [gi|11323019](#) pol [Drosophila melanogaster]

## Probability Based Mowse Score

Ions score is  $-10 \cdot \log(P)$ , where P is the probability that the observed match is a random event.  
 Individual ions scores > 23 indicate identity or extensive homology ( $p < 0.05$ ).  
 Protein scores are derived from ions scores as a non-probabilistic basis for ranking protein hits.

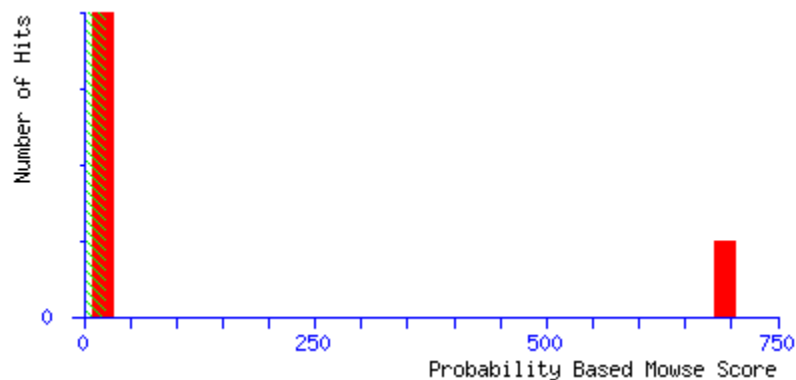

## Peptide Summary Report

Format As

[Help](#)

Significance threshold  $p <$   Max. number of hits

Standard scoring  MudPIT scoring  Ions score or expect cut-off  Show sub-sets   
 Show pop-ups  Suppress pop-ups  Sort unassigned  Require bold red

Error tolerant

1. [gi|18860063](#) Mass: 46969 Score: 693 Queries matched: 24 emPAI: 3.77  
 Rpt3 CG16916-PA [Drosophila melanogaster]

Check to include this hit in error tolerant search or archive report

| Query                                                    | Observed  | Mr (expt) | Mr (calc) | ppm  | Miss | Score | Expect   | Rank | Peptide                               |
|----------------------------------------------------------|-----------|-----------|-----------|------|------|-------|----------|------|---------------------------------------|
| <input checked="" type="checkbox"/> <a href="#">1366</a> | 706.4517  | 705.4444  | 705.4425  | 2.68 | 0    | 21    | 0.03     | 1    | R.YIVLAK.D                            |
| <input checked="" type="checkbox"/> <a href="#">1471</a> | 396.2069  | 790.3993  | 790.3973  | 2.47 | 0    | 21    | 0.18     | 1    | K.YLGEGPR.M                           |
| <input checked="" type="checkbox"/> <a href="#">1600</a> | 469.7492  | 937.4838  | 937.4804  | 3.62 | 1    | 26    | 0.028    | 1    | R.MVRDVFR.L + Oxidation (M)           |
| <input checked="" type="checkbox"/> <a href="#">1621</a> | 496.7754  | 991.5362  | 991.5339  | 2.35 | 0    | 59    | 1.1e-005 | 1    | R.VVGSEFVQK.Y                         |
| <input checked="" type="checkbox"/> <a href="#">1624</a> | 995.5785  | 994.5712  | 994.5699  | 1.29 | 0    | (30)  | 0.0089   | 1    | R.LVFSTITSK.M                         |
| <input checked="" type="checkbox"/> <a href="#">1625</a> | 498.2930  | 994.5714  | 994.5699  | 1.52 | 0    | 45    | 0.00025  | 1    | R.LVFSTITSK.M                         |
| <input checked="" type="checkbox"/> <a href="#">1663</a> | 576.3441  | 1150.6737 | 1150.6710 | 2.38 | 1    | 36    | 0.0012   | 1    | K.RLVFSTITSK.M                        |
| <input checked="" type="checkbox"/> <a href="#">1672</a> | 613.3465  | 1224.6785 | 1224.6754 | 2.53 | 1    | 49    | 9.8e-005 | 1    | R.YIVLAKDFEK.G                        |
| <input checked="" type="checkbox"/> <a href="#">1673</a> | 409.2339  | 1224.6798 | 1224.6754 | 3.62 | 1    | (23)  | 0.028    | 1    | R.YIVLAKDFEK.G                        |
| <input checked="" type="checkbox"/> <a href="#">1681</a> | 424.2481  | 1269.7223 | 1269.7193 | 2.36 | 2    | 31    | 0.0056   | 1    | R.KIEFPLPDRR.Q                        |
| <input checked="" type="checkbox"/> <a href="#">1686</a> | 437.5707  | 1309.6902 | 1309.6891 | 0.83 | 0    | (37)  | 0.0028   | 1    | K.AVAHHTTASFIR.V                      |
| <input checked="" type="checkbox"/> <a href="#">1687</a> | 655.8548  | 1309.6951 | 1309.6891 | 4.57 | 0    | 49    | 0.00016  | 1    | K.AVAHHTTASFIR.V                      |
| <input checked="" type="checkbox"/> <a href="#">1694</a> | 701.3615  | 1400.7084 | 1400.7048 | 2.59 | 1    | (35)  | 0.004    | 1    | K.EYLHAQEEVKR.I                       |
| <input checked="" type="checkbox"/> <a href="#">1695</a> | 467.9104  | 1400.7095 | 1400.7048 | 3.37 | 1    | 44    | 0.00059  | 1    | K.EYLHAQEEVKR.I                       |
| <input checked="" type="checkbox"/> <a href="#">1698</a> | 498.2438  | 1491.7097 | 1491.7066 | 2.05 | 1    | 36    | 0.0029   | 1    | R.FDAQTGADREVQR.I                     |
| <input checked="" type="checkbox"/> <a href="#">1699</a> | 746.8630  | 1491.7114 | 1491.7066 | 3.21 | 1    | (26)  | 0.03     | 1    | R.FDAQTGADREVQR.I                     |
| <input checked="" type="checkbox"/> <a href="#">1705</a> | 824.9144  | 1647.8142 | 1647.8077 | 3.96 | 2    | 31    | 0.016    | 1    | K.RFDAQTGADREVQR.I                    |
| <input checked="" type="checkbox"/> <a href="#">1711</a> | 844.9510  | 1687.8874 | 1687.8821 | 3.12 | 0    | 46    | 0.00042  | 1    | R.EAVELPLTHFELYK.Q                    |
| <input checked="" type="checkbox"/> <a href="#">1739</a> | 675.3043  | 2022.8910 | 2022.8840 | 3.46 | 0    | 22    | 0.032    | 1    | K.DAHSSLDELDMEDLYVR.Y + Oxidation (M) |
| <input checked="" type="checkbox"/> <a href="#">1743</a> | 708.3394  | 2121.9963 | 2121.9888 | 3.54 | 0    | 29    | 0.016    | 1    | K.MNLSEDVDLEEFVARPK.I + Oxidation (   |
| <input checked="" type="checkbox"/> <a href="#">1748</a> | 1085.0417 | 2168.0688 | 2168.0637 | 2.34 | 1    | 76    | 3.7e-007 | 1    | K.TLEFIEVQEEYIKDEQR.N                 |
| <input checked="" type="checkbox"/> <a href="#">1749</a> | 723.6969  | 2168.0690 | 2168.0637 | 2.43 | 1    | (47)  | 0.00034  | 1    | K.TLEFIEVQEEYIKDEQR.N                 |
| <input type="checkbox"/> <a href="#">1752</a>            | 1104.5680 | 2207.1214 | 2207.1144 | 3.17 | 0    | 71    | 1.5e-006 | 1    | R.ILLELLNQMDGFDQTTNVK.V + Oxidation   |

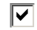 [1753](#) 736.7148 2207.1225 2207.1144 3.69 0 (61) 1.5e-005 1 R.IILLELLNQMDGFDQTTNVK.V + Oxidation

2. [gi|3426089](#) Mass: 177601 Score: 31 Queries matched: 5 emPAI: 0.02  
polyprotein [Drosophila melanogaster]

 Check to include this hit in error tolerant search or archive report

| Query                                                    | Observed | Mr(expt) | Mr(calc) | ppm  | Miss | Score | Expect | Rank | Peptide    |
|----------------------------------------------------------|----------|----------|----------|------|------|-------|--------|------|------------|
| <input checked="" type="checkbox"/> <a href="#">1295</a> | 672.4048 | 671.3975 | 671.3966 | 1.27 | 0    | (27)  | 0.028  | 1    | K.TVSLPR.L |
| <input checked="" type="checkbox"/> <a href="#">1296</a> | 672.4049 | 671.3976 | 671.3966 | 1.42 | 0    | 31    | 0.01   | 1    | K.TVSLPR.L |
| <input checked="" type="checkbox"/> <a href="#">1297</a> | 672.4050 | 671.3977 | 671.3966 | 1.60 | 0    | (21)  | 0.12   | 1    | K.TVSLPR.L |
| <input checked="" type="checkbox"/> <a href="#">1298</a> | 672.4052 | 671.3979 | 671.3966 | 1.95 | 0    | (23)  | 0.077  | 1    | K.TVSLPR.L |
| <input checked="" type="checkbox"/> <a href="#">1299</a> | 672.4055 | 671.3982 | 671.3966 | 2.37 | 0    | (27)  | 0.027  | 1    | K.TVSLPR.L |

## Proteins matching the same set of peptides:

[gi|21214752](#) Mass: 206214 Score: 31 Queries matched: 5  
gag-pol polyprotein precursor; hypothetical protein [Drosophila melanogaster]

[gi|25009978](#) Mass: 83774 Score: 31 Queries matched: 5  
GH06606p [Drosophila melanogaster]

3. [gi|11323019](#) Mass: 139125 Score: 23 Queries matched: 1  
pol [Drosophila melanogaster]

 Check to include this hit in error tolerant search or archive report

| Query                                                    | Observed | Mr(expt) | Mr(calc) | ppm   | Miss | Score | Expect | Rank | Peptide      |
|----------------------------------------------------------|----------|----------|----------|-------|------|-------|--------|------|--------------|
| <input checked="" type="checkbox"/> <a href="#">1520</a> | 423.2277 | 844.4409 | 844.4443 | -4.06 | 0    | 23    | 0.082  | 1    | K.SPALWGSK.Q |

## Peptide matches not assigned to protein hits: (no details means no match)

| Query                                                    | Observed | Mr(expt) | Mr(calc) | ppm   | Miss | Score | Expect | Rank | Peptide                        |
|----------------------------------------------------------|----------|----------|----------|-------|------|-------|--------|------|--------------------------------|
| <input checked="" type="checkbox"/> <a href="#">1473</a> | 791.4439 | 790.4366 | 790.4371 | -0.65 | 1    | 19    | 0.33   | 1    | <u>Q</u> MLKQK + Oxidation (M) |
| <input checked="" type="checkbox"/> <a href="#">1525</a> | 423.7204 | 845.4263 | 845.4243 | 2.42  | 0    | 19    | 0.22   | 1    | ALAEAESR                       |
| <input checked="" type="checkbox"/> <a href="#">1594</a> | 466.7462 | 931.4778 | 931.4770 | 0.82  | 2    | 19    | 0.16   | 1    | ACSPRRSR                       |

 **Mascot Search Results**

User : Julie Kadrmas; gel band: #40  
Email : 110223FT\_JulieKadrmas\_40  
Search title : NCBI Drosophila DB trypsin specific search: Oxidation (MHW)  
MS data file : C:\Documents and Settings\cnelson\Desktop\Merge Files\_2011\February\_2011\merge\_110223FT\_JulieKad  
Database : NCBIInr (5335292 sequences; 1845185051 residues)  
Taxonomy : Drosophila (fruit flies) (50248 sequences)  
Timestamp : 24 Feb 2011 at 19:12:43 GMT  
Protein hits : [gi|45551086](#) ERp60 CG8983-PA, isoform A [Drosophila melanogaster]  
[gi|157570](#) gamma-tubulin  
[gi|158739](#) beta-1 tubulin  
[gi|20129399](#) Aldehyde dehydrogenase CG3752-PA [Drosophila melanogaster]  
[gi|6942155](#) putative cytoplasmic aminopeptidase [Drosophila melanogaster]  
[gi|1923274](#) Tpr homolog [Drosophila melanogaster]  
[gi|17944482](#) RH04336p [Drosophila melanogaster]  
[gi|17945899](#) RE40293p [Drosophila melanogaster]  
[gi|3426089](#) polyprotein [Drosophila melanogaster]  
[gi|304728](#) transcription factor  
[gi|19920576](#) CG3557-PA [Drosophila melanogaster]  
[gi|21429138](#) RE42508p [Drosophila melanogaster]  
[gi|9799628](#) Nut2 [Drosophila melanogaster]  
[gi|45550970](#) CG5792-PB, isoform B [Drosophila melanogaster]  
[gi|24644950](#) CG2767-PA [Drosophila melanogaster]

**Probability Based Mowse Score**

Ions score is  $-10 \cdot \log(P)$ , where P is the probability that the observed match is a random event.

Individual ions scores  $> 24$  indicate identity or extensive homology ( $p < 0.05$ ).

Protein scores are derived from ions scores as a non-probabilistic basis for ranking protein hits.

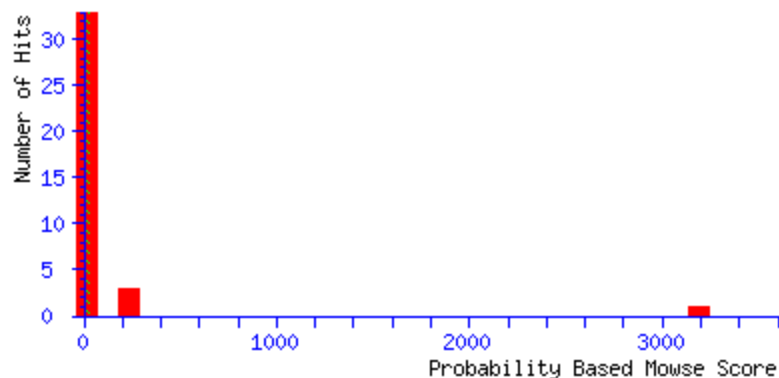

## Peptide Summary Report

Format As Peptide Summary [Help](#)

Significance threshold p<  Max. number of hits

Standard scoring  MudPIT scoring  Ions score or expect cut-off  Show sub-sets

Show pop-ups  Suppress pop-ups  Sort unassigned  Require bold red

Error tolerant

1. [gi|45551086](#) **Mass:** 55336 **Score:** 3195 **Queries matched:** 146 **emPAI:** 159.92  
 ERp60 CG8983-PA, isoform A [Drosophila melanogaster]  
 Check to include this hit in error tolerant search or archive report

| Query                                                    | Observed | Mr (expt) | Mr (calc) | ppm  | Miss | Score | Expect | Rank | Peptide   |
|----------------------------------------------------------|----------|-----------|-----------|------|------|-------|--------|------|-----------|
| <input checked="" type="checkbox"/> <a href="#">636</a>  | 487.3243 | 486.3170  | 486.3166  | 0.88 | 0    | 29    | 0.062  | 1    | K.VAVAK.N |
| <input checked="" type="checkbox"/> <a href="#">637</a>  | 487.3243 | 486.3170  | 486.3166  | 0.88 | 0    | (24)  | 0.21   | 1    | K.VAVAK.N |
| <input checked="" type="checkbox"/> <a href="#">638</a>  | 487.3243 | 486.3171  | 486.3166  | 1.01 | 0    | (29)  | 0.063  | 1    | K.VAVAK.N |
| <input checked="" type="checkbox"/> <a href="#">1105</a> | 603.3359 | 602.3286  | 602.3275  | 1.78 | 0    | 30    | 0.03   | 1    | K.EVLDK.Q |
| <input checked="" type="checkbox"/> <a href="#">1106</a> | 603.3367 | 602.3295  | 602.3275  | 3.19 | 0    | (23)  | 0.17   | 1    | K.EVLDK.Q |
| <input checked="" type="checkbox"/> <a href="#">1146</a> | 613.4402 | 612.4330  | 612.4323  | 1.16 | 0    | 27    | 0.022  | 1    | K.IVLIR.A |
| <input checked="" type="checkbox"/> <a href="#">1147</a> | 613.4403 | 612.4331  | 612.4323  | 1.30 | 0    | (23)  | 0.049  | 1    | K.IVLIR.A |

|                                     |                      |          |           |           |      |   |      |          |   |              |  |  |
|-------------------------------------|----------------------|----------|-----------|-----------|------|---|------|----------|---|--------------|--|--|
| <input checked="" type="checkbox"/> |                      |          |           |           |      |   |      |          |   |              |  |  |
| <input checked="" type="checkbox"/> | <a href="#">1148</a> | 613.4406 | 612.4333  | 612.4323  | 1.65 | 0 | (26) | 0.03     | 1 | K.IVLIR.A    |  |  |
| <input checked="" type="checkbox"/> | <a href="#">1187</a> | 623.3413 | 622.3340  | 622.3326  | 2.28 | 0 | 28   | 0.026    | 1 | K.FLDTK.D    |  |  |
|                                     | <a href="#">1291</a> | 660.3943 | 659.3870  | 659.3854  | 2.53 | 0 | (31) | 0.013    | 4 | R.TVAELK.K   |  |  |
|                                     | <a href="#">1292</a> | 660.3946 | 659.3874  | 659.3854  | 3.03 | 0 | 32   | 0.011    | 4 | R.TVAELK.K   |  |  |
| <input checked="" type="checkbox"/> | <a href="#">1338</a> | 675.3682 | 674.3610  | 674.3599  | 1.59 | 0 | (28) | 0.039    | 1 | R.EASGIAK.Y  |  |  |
| <input checked="" type="checkbox"/> | <a href="#">1339</a> | 675.3683 | 674.3610  | 674.3599  | 1.68 | 0 | (26) | 0.061    | 1 | R.EASGIAK.Y  |  |  |
| <input checked="" type="checkbox"/> | <a href="#">1340</a> | 675.3689 | 674.3617  | 674.3599  | 2.63 | 0 | (25) | 0.1      | 1 | R.EASGIAK.Y  |  |  |
| <input checked="" type="checkbox"/> | <a href="#">1341</a> | 675.3690 | 674.3617  | 674.3599  | 2.72 | 0 | 29   | 0.035    | 1 | R.EASGIAK.Y  |  |  |
| <input checked="" type="checkbox"/> | <a href="#">1482</a> | 746.4059 | 745.3987  | 745.3970  | 2.25 | 1 | 29   | 0.03     | 1 | R.DEKNLK.Y   |  |  |
| <input checked="" type="checkbox"/> | <a href="#">1503</a> | 379.2143 | 756.4140  | 756.4130  | 1.37 | 0 | (36) | 0.0025   | 1 | R.AQVGPASK.T |  |  |
| <input checked="" type="checkbox"/> | <a href="#">1504</a> | 379.2143 | 756.4141  | 756.4130  | 1.45 | 0 | 51   | 9.6e-005 | 1 | R.AQVGPASK.T |  |  |
| <input checked="" type="checkbox"/> | <a href="#">1505</a> | 757.4215 | 756.4142  | 756.4130  | 1.56 | 0 | (21) | 0.08     | 1 | R.AQVGPASK.T |  |  |
| <input checked="" type="checkbox"/> | <a href="#">1506</a> | 757.4215 | 756.4142  | 756.4130  | 1.64 | 0 | (34) | 0.0042   | 1 | R.AQVGPASK.T |  |  |
| <input checked="" type="checkbox"/> | <a href="#">1507</a> | 379.2145 | 756.4145  | 756.4130  | 2.02 | 0 | (48) | 0.00018  | 1 | R.AQVGPASK.T |  |  |
| <input checked="" type="checkbox"/> | <a href="#">1508</a> | 757.4221 | 756.4148  | 756.4130  | 2.37 | 0 | (23) | 0.05     | 1 | R.AQVGPASK.T |  |  |
| <input checked="" type="checkbox"/> | <a href="#">1524</a> | 383.7147 | 765.4149  | 765.4133  | 2.10 | 0 | (26) | 0.019    | 1 | R.APHLSNK.F  |  |  |
| <input checked="" type="checkbox"/> | <a href="#">1525</a> | 383.7148 | 765.4150  | 765.4133  | 2.14 | 0 | 34   | 0.0031   | 1 | R.APHLSNK.F  |  |  |
| <input checked="" type="checkbox"/> | <a href="#">1526</a> | 766.4226 | 765.4153  | 765.4133  | 2.64 | 0 | (24) | 0.03     | 1 | R.APHLSNK.F  |  |  |
| <input checked="" type="checkbox"/> | <a href="#">1555</a> | 394.7482 | 787.4818  | 787.4803  | 1.85 | 1 | 29   | 0.014    | 1 | R.TVAELKK.F  |  |  |
|                                     | <a href="#">1556</a> | 394.7483 | 787.4820  | 787.4803  | 2.09 | 1 | (20) | 0.12     | 2 | R.TVAELKK.F  |  |  |
| <input checked="" type="checkbox"/> | <a href="#">1558</a> | 394.7484 | 787.4823  | 787.4803  | 2.54 | 1 | (28) | 0.019    | 1 | R.TVAELKK.F  |  |  |
| <input checked="" type="checkbox"/> | <a href="#">1559</a> | 394.7485 | 787.4825  | 787.4803  | 2.70 | 1 | (28) | 0.017    | 1 | R.TVAELKK.F  |  |  |
| <input checked="" type="checkbox"/> | <a href="#">1560</a> | 788.4915 | 787.4842  | 787.4803  | 4.89 | 1 | (21) | 0.085    | 1 | R.TVAELKK.F  |  |  |
| <input checked="" type="checkbox"/> | <a href="#">1579</a> | 791.4162 | 790.4089  | 790.4072  | 2.12 | 0 | (29) | 0.02     | 1 | K.EATTELK.G  |  |  |
| <input checked="" type="checkbox"/> | <a href="#">1580</a> | 791.4162 | 790.4090  | 790.4072  | 2.18 | 0 | (21) | 0.15     | 1 | K.EATTELK.G  |  |  |
| <input checked="" type="checkbox"/> | <a href="#">1581</a> | 396.2118 | 790.4091  | 790.4072  | 2.36 | 0 | 31   | 0.013    | 1 | K.EATTELK.G  |  |  |
| <input checked="" type="checkbox"/> | <a href="#">1586</a> | 398.6911 | 795.3676  | 795.3664  | 1.57 | 0 | 25   | 0.021    | 1 | K.GTNYWR.N   |  |  |
| <input checked="" type="checkbox"/> | <a href="#">1589</a> | 399.2061 | 796.3976  | 796.3967  | 1.23 | 0 | 25   | 0.02     | 1 | K.FESSIK.F   |  |  |
| <input checked="" type="checkbox"/> | <a href="#">1593</a> | 799.3848 | 798.3775  | 798.3759  | 1.94 | 0 | 31   | 0.0036   | 1 | K.DDDPIK.L   |  |  |
| <input checked="" type="checkbox"/> | <a href="#">1674</a> | 424.7482 | 847.4818  | 847.4803  | 1.80 | 0 | 28   | 0.015    | 1 | R.LKPEYAK.A  |  |  |
| <input checked="" type="checkbox"/> | <a href="#">1725</a> | 433.2195 | 864.4244  | 864.4229  | 1.69 | 0 | 36   | 0.0035   | 1 | R.EVDDFLK.Y  |  |  |
| <input checked="" type="checkbox"/> | <a href="#">1871</a> | 502.7991 | 1003.5837 | 1003.5814 | 2.25 | 1 | (27) | 0.017    | 1 | K.RLKPEYAK.A |  |  |
|                                     | <a href="#">1872</a> | 502.7998 | 1003.5851 | 1003.5814 | 3.68 | 1 | 33   | 0.0046   | 1 | K.RLKPEYAK.A |  |  |



|                                     |                      |          |           |           |      |   |      |          |   |                                     |
|-------------------------------------|----------------------|----------|-----------|-----------|------|---|------|----------|---|-------------------------------------|
| <input checked="" type="checkbox"/> | <a href="#">2175</a> | 710.3921 | 1418.7696 | 1418.7656 | 2.77 | 1 | 64   | 4.9e-006 | 1 | K.KLSPIYEELA.EK.L                   |
| <input checked="" type="checkbox"/> | <a href="#">2178</a> | 712.3850 | 1422.7554 | 1422.7507 | 3.30 | 0 | (85) | 3.3e-008 | 1 | K.EFVGQINFALASK.D                   |
| <input checked="" type="checkbox"/> | <a href="#">2179</a> | 712.3852 | 1422.7559 | 1422.7507 | 3.65 | 0 | 90   | 1.2e-008 | 1 | K.EFVGQINFALASK.D                   |
| <input checked="" type="checkbox"/> | <a href="#">2230</a> | 760.4210 | 1518.8274 | 1518.8235 | 2.55 | 1 | 45   | 0.00039  | 1 | R.GFPTLFWLPKDAK.N                   |
| <input checked="" type="checkbox"/> | <a href="#">2235</a> | 766.8612 | 1531.7078 | 1531.7042 | 2.34 | 0 | 94   | 3.4e-009 | 1 | K.FEGSSESDLSTFVK.E                  |
| <input checked="" type="checkbox"/> | <a href="#">2236</a> | 766.8620 | 1531.7095 | 1531.7042 | 3.45 | 0 | (72) | 4.9e-007 | 1 | K.FEGSSESDLSTFVK.E                  |
| <input checked="" type="checkbox"/> | <a href="#">2237</a> | 766.8624 | 1531.7102 | 1531.7042 | 3.93 | 0 | (50) | 8.3e-005 | 1 | K.FEGSSESDLSTFVK.E                  |
| <input checked="" type="checkbox"/> | <a href="#">2243</a> | 515.6085 | 1543.8036 | 1543.7994 | 2.67 | 1 | (21) | 0.11     | 1 | R.APHLSNKFESSIK.F                   |
| <input checked="" type="checkbox"/> | <a href="#">2244</a> | 772.9107 | 1543.8069 | 1543.7994 | 4.82 | 1 | 49   | 0.00022  | 1 | R.APHLSNKFESSIK.F                   |
| <input checked="" type="checkbox"/> | <a href="#">2263</a> | 791.8500 | 1581.6854 | 1581.6835 | 1.20 | 0 | (38) | 0.00053  | 1 | K.DTTLFGYFSDSDSK.L                  |
| <input checked="" type="checkbox"/> | <a href="#">2264</a> | 791.8512 | 1581.6878 | 1581.6835 | 2.75 | 0 | 55   | 2.2e-005 | 1 | K.DTTLFGYFSDSDSK.L                  |
| <input checked="" type="checkbox"/> | <a href="#">2265</a> | 791.8518 | 1581.6890 | 1581.6835 | 3.48 | 0 | (29) | 0.01     | 1 | K.DTTLFGYFSDSDSK.L                  |
| <input checked="" type="checkbox"/> | <a href="#">2266</a> | 791.8523 | 1581.6901 | 1581.6835 | 4.17 | 0 | (42) | 0.00051  | 1 | K.DTTLFGYFSDSDSK.L                  |
| <input checked="" type="checkbox"/> | <a href="#">2298</a> | 559.2640 | 1674.7701 | 1674.7672 | 1.75 | 0 | (39) | 0.0013   | 1 | K.MDATANDVPPEFNVR.G                 |
| <input checked="" type="checkbox"/> | <a href="#">2299</a> | 838.3934 | 1674.7723 | 1674.7672 | 3.04 | 0 | (40) | 0.0011   | 1 | K.MDATANDVPPEFNVR.G                 |
| <input checked="" type="checkbox"/> | <a href="#">2300</a> | 838.3936 | 1674.7726 | 1674.7672 | 3.25 | 0 | (57) | 1.9e-005 | 1 | K.MDATANDVPPEFNVR.G                 |
| <input checked="" type="checkbox"/> | <a href="#">2301</a> | 838.3936 | 1674.7727 | 1674.7672 | 3.29 | 0 | (82) | 5.9e-008 | 1 | K.MDATANDVPPEFNVR.G                 |
| <input checked="" type="checkbox"/> | <a href="#">2309</a> | 846.3901 | 1690.7656 | 1690.7621 | 2.08 | 0 | 102  | 5.6e-010 | 1 | K.MDATANDVPPEFNVR.G + Oxidation (M) |
| <input checked="" type="checkbox"/> | <a href="#">2310</a> | 846.3905 | 1690.7665 | 1690.7621 | 2.58 | 0 | (60) | 8.1e-006 | 1 | K.MDATANDVPPEFNVR.G + Oxidation (M) |
| <input checked="" type="checkbox"/> | <a href="#">2311</a> | 846.3907 | 1690.7668 | 1690.7621 | 2.80 | 0 | (59) | 1e-005   | 1 | K.MDATANDVPPEFNVR.G + Oxidation (M) |
| <input checked="" type="checkbox"/> | <a href="#">2312</a> | 564.5964 | 1690.7673 | 1690.7621 | 3.08 | 0 | (36) | 0.0021   | 1 | K.MDATANDVPPEFNVR.G + Oxidation (M) |
| <input checked="" type="checkbox"/> | <a href="#">2313</a> | 846.3911 | 1690.7677 | 1690.7621 | 3.31 | 0 | (81) | 7.2e-008 | 1 | K.MDATANDVPPEFNVR.G + Oxidation (M) |
| <input checked="" type="checkbox"/> | <a href="#">2319</a> | 565.6227 | 1693.8464 | 1693.8424 | 2.38 | 2 | 35   | 0.0045   | 1 | K.YRFGHSSEKEVLDK.Q                  |
| <input checked="" type="checkbox"/> | <a href="#">2326</a> | 849.8990 | 1697.7834 | 1697.7784 | 2.90 | 0 | 61   | 9.7e-006 | 1 | K.DEFSVENLQDFVEK.L                  |
| <input checked="" type="checkbox"/> | <a href="#">2342</a> | 861.4851 | 1720.9557 | 1720.9512 | 2.64 | 1 | 45   | 0.00028  | 1 | K.VAKEFVGQINFALASK.D                |
| <input checked="" type="checkbox"/> | <a href="#">2343</a> | 574.6594 | 1720.9564 | 1720.9512 | 3.00 | 1 | (40) | 0.00071  | 1 | K.VAKEFVGQINFALASK.D                |
| <input checked="" type="checkbox"/> | <a href="#">2344</a> | 861.9870 | 1721.9595 | 1721.9563 | 1.85 | 2 | (36) | 0.0015   | 1 | K.AAEIVKDDDPIKLA.K.V                |
| <input checked="" type="checkbox"/> | <a href="#">2345</a> | 574.9941 | 1721.9603 | 1721.9563 | 2.33 | 2 | (47) | 0.00013  | 1 | K.AAEIVKDDDPIKLA.K.V                |
| <input checked="" type="checkbox"/> | <a href="#">2346</a> | 574.9941 | 1721.9605 | 1721.9563 | 2.43 | 2 | (45) | 0.00023  | 1 | K.AAEIVKDDDPIKLA.K.V                |
| <input checked="" type="checkbox"/> | <a href="#">2347</a> | 861.9884 | 1721.9622 | 1721.9563 | 3.41 | 2 | 55   | 2.1e-005 | 1 | K.AAEIVKDDDPIKLA.K.V                |
| <input checked="" type="checkbox"/> | <a href="#">2348</a> | 581.3102 | 1740.9087 | 1740.9046 | 2.35 | 2 | (46) | 0.00038  | 1 | K.YIAKEATTELKGFDR.S                 |
| <input checked="" type="checkbox"/> | <a href="#">2349</a> | 581.3104 | 1740.9094 | 1740.9046 | 2.77 | 2 | 54   | 5e-005   | 1 | K.YIAKEATTELKGFDR.S                 |
| <input checked="" type="checkbox"/> | <a href="#">2367</a> | 608.6283 | 1822.8631 | 1822.8598 | 1.78 | 1 | (38) | 0.0021   | 1 | K.IFRQDEVSQDYNGPR.E                 |



|                                     |                      |           |           |           |       |   |      |          |   |                             |
|-------------------------------------|----------------------|-----------|-----------|-----------|-------|---|------|----------|---|-----------------------------|
| <input checked="" type="checkbox"/> | <a href="#">2368</a> | 608.6288  | 1822.8647 | 1822.8598 | 2.68  | 1 | (41) | 0.0011   | 1 | K.IFRQDEVSQDYNGPR.E         |
| <input checked="" type="checkbox"/> | <a href="#">2369</a> | 912.4398  | 1822.8651 | 1822.8598 | 2.92  | 1 | (61) | 1.1e-005 | 1 | K.IFRQDEVSQDYNGPR.E         |
| <input checked="" type="checkbox"/> | <a href="#">2370</a> | 912.4403  | 1822.8660 | 1822.8598 | 3.39  | 1 | 63   | 6.5e-006 | 1 | K.IFRQDEVSQDYNGPR.E         |
| <input checked="" type="checkbox"/> | <a href="#">2386</a> | 617.6690  | 1849.9851 | 1849.9785 | 3.56  | 1 | (33) | 0.0076   | 1 | K.SEPIPESNDAPVKVAVAK.N      |
| <input checked="" type="checkbox"/> | <a href="#">2387</a> | 925.9999  | 1849.9853 | 1849.9785 | 3.65  | 1 | 88   | 2.6e-008 | 1 | K.SEPIPESNDAPVKVAVAK.N      |
| <input checked="" type="checkbox"/> | <a href="#">2392</a> | 619.3565  | 1855.0477 | 1855.0415 | 3.36  | 2 | 50   | 5.7e-005 | 1 | K.EVLDKQGETDKIVLIR.A        |
| <input checked="" type="checkbox"/> | <a href="#">2398</a> | 947.9589  | 1893.9032 | 1893.8996 | 1.87  | 1 | 64   | 8.1e-006 | 1 | K.DTTLFGYFSDSDSKLAK.I       |
| <input checked="" type="checkbox"/> | <a href="#">2399</a> | 632.3086  | 1893.9040 | 1893.8996 | 2.28  | 1 | (28) | 0.032    | 1 | K.DTTLFGYFSDSDSKLAK.I       |
| <input checked="" type="checkbox"/> | <a href="#">2440</a> | 678.6660  | 2032.9760 | 2032.9702 | 2.89  | 2 | 39   | 0.002    | 1 | R.FGHSSEKEVLDKQGETDK.I      |
| <input checked="" type="checkbox"/> | <a href="#">2444</a> | 688.6591  | 2062.9554 | 2062.9556 | -0.06 | 1 | 33   | 0.0071   | 1 | R.QDEVSQDYNGPREASGIAK.Y     |
| <input checked="" type="checkbox"/> | <a href="#">2445</a> | 1033.0011 | 2063.9877 | 2063.9840 | 1.79  | 0 | (89) | 2e-008   | 1 | K.DFQNPPLITAYYSVDYQK.N      |
| <input checked="" type="checkbox"/> | <a href="#">2446</a> | 1033.0017 | 2063.9889 | 2063.9840 | 2.38  | 0 | 95   | 4.7e-009 | 1 | K.DFQNPPLITAYYSVDYQK.N      |
| <input checked="" type="checkbox"/> | <a href="#">2447</a> | 689.0041  | 2063.9905 | 2063.9840 | 3.16  | 0 | (64) | 5.8e-006 | 1 | K.DFQNPPLITAYYSVDYQK.N      |
| <input checked="" type="checkbox"/> | <a href="#">2457</a> | 725.3622  | 2173.0647 | 2173.0579 | 3.14  | 1 | (50) | 0.00019  | 1 | K.YALKDEFSVENLQDFVEK.L      |
| <input checked="" type="checkbox"/> | <a href="#">2458</a> | 1087.5414 | 2173.0682 | 2173.0579 | 4.72  | 1 | 85   | 5.8e-008 | 1 | K.YALKDEFSVENLQDFVEK.L      |
| <input checked="" type="checkbox"/> | <a href="#">2459</a> | 729.6779  | 2186.0119 | 2186.0056 | 2.91  | 1 | (46) | 0.00038  | 1 | K.FLDTKDITLFGYFSDSDSK.L     |
| <input checked="" type="checkbox"/> | <a href="#">2460</a> | 1094.0135 | 2186.0125 | 2186.0056 | 3.16  | 1 | 106  | 3.4e-010 | 1 | K.FLDTKDITLFGYFSDSDSK.L     |
| <input checked="" type="checkbox"/> | <a href="#">2461</a> | 729.6788  | 2186.0145 | 2186.0056 | 4.08  | 1 | (21) | 0.12     | 1 | K.FLDTKDITLFGYFSDSDSK.L     |
| <input checked="" type="checkbox"/> | <a href="#">2496</a> | 771.0404  | 2310.0994 | 2310.0903 | 3.92  | 1 | 47   | 0.00033  | 1 | K.FESSIKFEGSSEDLSTFVK.E     |
| <input checked="" type="checkbox"/> | <a href="#">2497</a> | 771.0408  | 2310.1007 | 2310.0903 | 4.48  | 1 | (41) | 0.00094  | 1 | K.FESSIKFEGSSEDLSTFVK.E     |
| <input checked="" type="checkbox"/> | <a href="#">2499</a> | 772.3745  | 2314.1015 | 2314.1005 | 0.43  | 2 | 34   | 0.0073   | 1 | K.KFLDITLFGYFSDSDSK.L       |
| <input checked="" type="checkbox"/> | <a href="#">2504</a> | 801.4305  | 2401.2696 | 2401.2628 | 2.85  | 1 | (50) | 8.8e-005 | 1 | K.LSPIYEELAEKLQEDVAIVK.M    |
| <input checked="" type="checkbox"/> | <a href="#">2505</a> | 1201.6422 | 2401.2699 | 2401.2628 | 2.98  | 1 | 65   | 2.7e-006 | 1 | K.LSPIYEELAEKLQEDVAIVK.M    |
| <input checked="" type="checkbox"/> | <a href="#">2506</a> | 1202.5951 | 2403.1757 | 2403.1747 | 0.43  | 1 | 47   | 0.00039  | 1 | K.DFQNPPLITAYYSVDYQKNPK.G   |
| <input checked="" type="checkbox"/> | <a href="#">2507</a> | 1202.5988 | 2403.1830 | 2403.1747 | 3.48  | 1 | (35) | 0.0058   | 1 | K.DFQNPPLITAYYSVDYQKNPK.G   |
| <input checked="" type="checkbox"/> | <a href="#">2508</a> | 802.0683  | 2403.1831 | 2403.1747 | 3.50  | 1 | (37) | 0.0041   | 1 | K.DFQNPPLITAYYSVDYQKNPK.G   |
| <input checked="" type="checkbox"/> | <a href="#">2509</a> | 802.0685  | 2403.1836 | 2403.1747 | 3.73  | 1 | (28) | 0.029    | 1 | K.DFQNPPLITAYYSVDYQKNPK.G   |
| <input checked="" type="checkbox"/> | <a href="#">2513</a> | 827.4123  | 2479.2151 | 2479.2091 | 2.42  | 2 | 34   | 0.0079   | 1 | K.IFRQDEVSQDYNGPREASGIAK.Y  |
| <input checked="" type="checkbox"/> | <a href="#">2516</a> | 1250.1217 | 2498.2289 | 2498.2217 | 2.89  | 2 | (50) | 0.00017  | 1 | K.FLDTKDITLFGYFSDSDSKLAK.I  |
| <input checked="" type="checkbox"/> | <a href="#">2517</a> | 833.7509  | 2498.2307 | 2498.2217 | 3.62  | 2 | 56   | 5.2e-005 | 1 | K.FLDTKDITLFGYFSDSDSKLAK.I  |
| <input checked="" type="checkbox"/> | <a href="#">2518</a> | 844.1299  | 2529.3680 | 2529.3577 | 4.06  | 2 | 55   | 3.1e-005 | 1 | K.KLSPIYEELAEKLQEDVAIVK.M   |
| <input checked="" type="checkbox"/> | <a href="#">2524</a> | 889.4711  | 2665.3916 | 2665.3850 | 2.46  | 1 | (36) | 0.0038   | 1 | K.LLANELEPYIKSEPIESNDAPVK.V |
| <input checked="" type="checkbox"/> | <a href="#">2525</a> | 889.4717  | 2665.3933 | 2665.3850 | 3.12  | 1 | 39   | 0.0016   | 1 | K.LLANELEPYIKSEPIESNDAPVK.V |

|                                     |                      |           |           |           |      |   |      |          |   |                                                |
|-------------------------------------|----------------------|-----------|-----------|-----------|------|---|------|----------|---|------------------------------------------------|
| <input checked="" type="checkbox"/> | <a href="#">2534</a> | 908.4475  | 2722.3207 | 2722.3126 | 2.97 | 1 | (42) | 0.0011   | 1 | R.TQDSVKDFQNP <del>L</del> ITAYYSVDYQK.N       |
| <input checked="" type="checkbox"/> | <a href="#">2535</a> | 1362.1676 | 2722.3207 | 2722.3126 | 2.97 | 1 | 50   | 0.00018  | 1 | R.TQDSVKDFQNP <del>L</del> ITAYYSVDYQK.N       |
| <input checked="" type="checkbox"/> | <a href="#">2536</a> | 908.4482  | 2722.3226 | 2722.3126 | 3.67 | 1 | (48) | 0.00025  | 1 | R.TQDSVKDFQNP <del>L</del> ITAYYSVDYQK.N       |
| <input checked="" type="checkbox"/> | <a href="#">2540</a> | 934.7944  | 2801.3613 | 2801.3542 | 2.54 | 1 | (41) | 0.0014   | 1 | K.LQDEDVAIVKMDATANDVPPEFNVR.G + Oxid           |
| <input checked="" type="checkbox"/> | <a href="#">2541</a> | 934.7952  | 2801.3637 | 2801.3542 | 3.39 | 1 | 44   | 0.00068  | 1 | K.LQDEDVAIVKMDATANDVPPEFNVR.G + Oxid           |
| <input checked="" type="checkbox"/> | <a href="#">2542</a> | 934.7963  | 2801.3672 | 2801.3542 | 4.63 | 1 | (25) | 0.059    | 1 | K.LQDEDVAIVKMDATANDVPPEFNVR.G + Oxid           |
| <input checked="" type="checkbox"/> | <a href="#">2545</a> | 1021.5118 | 3061.5135 | 3061.5033 | 3.35 | 2 | 83   | 1.1e-007 | 1 | R.TQDSVKDFQNP <del>L</del> ITAYYSVDYQKNPK.G    |
| <input checked="" type="checkbox"/> | <a href="#">2546</a> | 1045.5743 | 3133.7010 | 3133.6910 | 3.19 | 2 | 59   | 5.3e-006 | 1 | K.LLANELEPYIKSEPIPE <del>S</del> NDAPVKVAVAK.N |

2. [gi|157570](#) Mass: 53278 Score: 244 Queries matched: 5 emPAI: 0.27

gamma-tubulin

Check to include this hit in error tolerant search or archive report

| Query                               | Observed             | Mr (expt) | Mr (calc) | ppm       | Miss | Score | Expect | Rank     | Peptide |                                  |
|-------------------------------------|----------------------|-----------|-----------|-----------|------|-------|--------|----------|---------|----------------------------------|
| <input checked="" type="checkbox"/> | <a href="#">1894</a> | 513.3047  | 1024.5949 | 1024.5917 | 3.13 | 0     | 37     | 0.00093  | 1       | R.AVLLDLEPR.V                    |
| <input checked="" type="checkbox"/> | <a href="#">1895</a> | 513.3051  | 1024.5956 | 1024.5917 | 3.84 | 0     | (32)   | 0.0034   | 1       | R.AVLLDLEPR.V                    |
| <input checked="" type="checkbox"/> | <a href="#">2118</a> | 664.3521  | 1326.6896 | 1326.6853 | 3.23 | 0     | 71     | 7.5e-007 | 1       | R.VINTIMGSVYSK.L + Oxidation (M) |
| <input checked="" type="checkbox"/> | <a href="#">2122</a> | 670.3494  | 1338.6842 | 1338.6819 | 1.68 | 0     | 45     | 0.00067  | 1       | K.LYNPENVYLSK.H                  |
| <input checked="" type="checkbox"/> | <a href="#">2395</a> | 937.0079  | 1872.0013 | 1871.9953 | 3.20 | 0     | 90     | 1.3e-008 | 1       | R.LTTAADSVVLDNTALNR.I            |

Proteins matching the same set of peptides:

[gi|3342456](#) Mass: 37046 Score: 244 Queries matched: 5

gamma-tubulin [Drosophila melanogaster]

[gi|17136618](#) Mass: 53306 Score: 244 Queries matched: 5

gamma-Tubulin at 23C CG3157-PA [Drosophila melanogaster]

3. [gi|158739](#) Mass: 50119 Score: 222 Queries matched: 5 emPAI: 0.29

beta-1 tubulin

Check to include this hit in error tolerant search or archive report

| Query                               | Observed             | Mr (expt) | Mr (calc) | ppm       | Miss | Score | Expect | Rank     | Peptide |                                |
|-------------------------------------|----------------------|-----------|-----------|-----------|------|-------|--------|----------|---------|--------------------------------|
| <input checked="" type="checkbox"/> | <a href="#">1923</a> | 527.3098  | 1052.6051 | 1052.6019 | 3.06 | 0     | 42     | 0.00051  | 1       | R.YLTVAAIFR.G                  |
| <input checked="" type="checkbox"/> | <a href="#">2062</a> | 623.3017  | 1244.5889 | 1244.5860 | 2.37 | 0     | 51     | 7.5e-005 | 1       | R.ISEQFTAMFR.R + Oxidation (M) |

|                                     |                      |          |           |           |      |   |    |          |   |                                        |
|-------------------------------------|----------------------|----------|-----------|-----------|------|---|----|----------|---|----------------------------------------|
| <input checked="" type="checkbox"/> | <a href="#">2275</a> | 809.4142 | 1616.8138 | 1616.8080 | 3.61 | 0 | 64 | 6.8e-006 | 1 | R.AVLVDLEPGTMDSVR.S + Oxidation (M)    |
| <input checked="" type="checkbox"/> | <a href="#">2329</a> | 854.4365 | 1706.8584 | 1706.8549 | 2.06 | 0 | 24 | 0.069    | 1 | R.ALTVPELTQQMFDK.N + Oxidation (M)     |
| <input checked="" type="checkbox"/> | <a href="#">2425</a> | 662.6392 | 1984.8957 | 1984.8904 | 2.66 | 1 | 41 | 0.00078  | 1 | R.MSMKEVDEQMLNIQNK.N + 3 Oxidation (M) |

## Proteins matching the same set of peptides:

[gi|24655737](#) Mass: 50115 Score: 222 Queries matched: 5  
beta-Tubulin at 56D CG9277-PB, isoform B [Drosophila melanogaster]  
[gi|24655741](#) Mass: 51264 Score: 222 Queries matched: 5  
beta-Tubulin at 56D CG9277-PA, isoform A [Drosophila melanogaster]

4. [gi|20129399](#) Mass: 56983 Score: 126 Queries matched: 2 emPAI: 0.12  
Aldehyde dehydrogenase CG3752-PA [Drosophila melanogaster]

Check to include this hit in error tolerant search or archive report

| Query                                                    | Observed | Mr(expt)  | Mr(calc)  | ppm  | Miss | Score | Expect | Rank | Peptide            |
|----------------------------------------------------------|----------|-----------|-----------|------|------|-------|--------|------|--------------------|
| <input checked="" type="checkbox"/> <a href="#">2250</a> | 778.3931 | 1554.7717 | 1554.7678 | 2.52 | 0    | 93    | 1e-008 | 1    | R.ANNSEYGLAAVFTK.D |
| <input checked="" type="checkbox"/> <a href="#">2357</a> | 597.2946 | 1788.8619 | 1788.8570 | 2.74 | 1    | 33    | 0.0064 | 1    | R.TFVEDKIYDEFVER.S |

## Proteins matching the same set of peptides:

[gi|68051705](#) Mass: 61886 Score: 126 Queries matched: 2  
GH22814p [Drosophila melanogaster]  
[gi|125986975](#) Mass: 56964 Score: 126 Queries matched: 2  
GA17661-PA [Drosophila pseudoobscura]

5. [gi|6942155](#) Mass: 60188 Score: 42 Queries matched: 1 emPAI: 0.05  
putative cytoplasmic aminopeptidase [Drosophila melanogaster]

Check to include this hit in error tolerant search or archive report

| Query                                                    | Observed | Mr(expt)  | Mr(calc)  | ppm  | Miss | Score | Expect  | Rank | Peptide         |
|----------------------------------------------------------|----------|-----------|-----------|------|------|-------|---------|------|-----------------|
| <input checked="" type="checkbox"/> <a href="#">1942</a> | 543.8117 | 1085.6089 | 1085.6081 | 0.79 | 0    | 42    | 0.00074 | 1    | K.GAQETIALVGK.G |

## Proteins matching the same set of peptides:

[gi|21357381](#) Mass: 60132 Score: 42 Queries matched: 1

granny smith CG7340-PB, isoform B [Drosophila melanogaster]  
[gi|24646410](#) Mass: 71134 Score: 42 Queries matched: 1  
 granny smith CG7340-PA, isoform A [Drosophila melanogaster]  
[gi|24646412](#) Mass: 62705 Score: 42 Queries matched: 1  
 granny smith CG7340-PC, isoform C [Drosophila melanogaster]  
[gi|25009916](#) Mass: 71132 Score: 42 Queries matched: 1  
 AT31511p [Drosophila melanogaster]  
[gi|125774513](#) Mass: 56357 Score: 42 Queries matched: 1  
 GA20276-PA [Drosophila pseudoobscura]

6. [gi|1923274](#) Mass: 262206 Score: 32 Queries matched: 1 emPAI: 0.01  
 Tpr homolog [Drosophila melanogaster]

Check to include this hit in error tolerant search or archive report

| Query                                                    | Observed | Mr(expt) | Mr(calc) | ppm  | Miss | Score | Expect | Rank | Peptide     |
|----------------------------------------------------------|----------|----------|----------|------|------|-------|--------|------|-------------|
| <input checked="" type="checkbox"/> <a href="#">1422</a> | 718.3640 | 717.3567 | 717.3544 | 3.19 | 0    | 32    | 0.012  | 1    | R.EELA EK.V |

Proteins matching the same set of peptides:

[gi|24652825](#) Mass: 262194 Score: 32 Queries matched: 1  
 Megator CG8274-PA [Drosophila melanogaster]

7. [gi|17944482](#) Mass: 56834 Score: 31 Queries matched: 2 emPAI: 0.06  
 RH04336p [Drosophila melanogaster]

Check to include this hit in error tolerant search or archive report

| Query                                                    | Observed | Mr(expt)  | Mr(calc)  | ppm  | Miss | Score | Expect | Rank | Peptide        |
|----------------------------------------------------------|----------|-----------|-----------|------|------|-------|--------|------|----------------|
| <input checked="" type="checkbox"/> <a href="#">1996</a> | 574.3413 | 1146.6680 | 1146.6648 | 2.76 | 0    | (26)  | 0.0095 | 1    | R.SFAQVEILLK.H |
| <input checked="" type="checkbox"/> <a href="#">1997</a> | 574.3420 | 1146.6695 | 1146.6648 | 4.04 | 0    | 31    | 0.0026 | 1    | R.SFAQVEILLK.H |

Proteins matching the same set of peptides:

[gi|24659664](#) Mass: 56825 Score: 31 Queries matched: 2  
 CG9953-PA [Drosophila melanogaster]

8. [gi|17945899](#) Score: 31 Queries matched: 1

RE40293p [Drosophila melanogaster]

 Check to include this hit in error tolerant search or archive report

| Query                                                    | Observed | Mr(expt) | Mr(calc) | ppm  | Miss | Score | Expect | Rank | Peptide   |
|----------------------------------------------------------|----------|----------|----------|------|------|-------|--------|------|-----------|
| <input checked="" type="checkbox"/> <a href="#">1214</a> | 637.3203 | 636.3131 | 636.3119 | 1.85 | 0    | 31    | 0.0065 | 1    | K.DDFIK.T |

**Proteins matching the same set of peptides:**

|                              |           |                    |
|------------------------------|-----------|--------------------|
| <a href="#">gi 24650758</a>  | Score: 31 | Queries matched: 1 |
| <a href="#">gi 24650760</a>  | Score: 31 | Queries matched: 1 |
| <a href="#">gi 24667151</a>  | Score: 31 | Queries matched: 1 |
| <a href="#">gi 24667155</a>  | Score: 31 | Queries matched: 1 |
| <a href="#">gi 125980730</a> | Score: 31 | Queries matched: 1 |

9. [gi|3426089](#) Mass: 177601 Score: 29 Queries matched: 5 emPAI: 0.02  
polyprotein [Drosophila melanogaster]

 Check to include this hit in error tolerant search or archive report

| Query                                                    | Observed | Mr(expt) | Mr(calc) | ppm  | Miss | Score | Expect | Rank | Peptide    |
|----------------------------------------------------------|----------|----------|----------|------|------|-------|--------|------|------------|
| <input checked="" type="checkbox"/> <a href="#">1327</a> | 672.4047 | 671.3974 | 671.3966 | 1.13 | 0    | (25)  | 0.049  | 1    | K.TVSLPR.L |
| <input checked="" type="checkbox"/> <a href="#">1328</a> | 672.4049 | 671.3976 | 671.3966 | 1.42 | 0    | 29    | 0.019  | 1    | K.TVSLPR.L |
| <input checked="" type="checkbox"/> <a href="#">1329</a> | 672.4049 | 671.3976 | 671.3966 | 1.51 | 0    | (29)  | 0.019  | 1    | K.TVSLPR.L |
| <input checked="" type="checkbox"/> <a href="#">1331</a> | 672.4051 | 671.3978 | 671.3966 | 1.78 | 0    | (22)  | 0.09   | 1    | K.TVSLPR.L |
| <input checked="" type="checkbox"/> <a href="#">1333</a> | 672.4058 | 671.3985 | 671.3966 | 2.77 | 0    | (24)  | 0.056  | 1    | K.TVSLPR.L |

**Proteins matching the same set of peptides:**

|                                                                               |              |           |                    |
|-------------------------------------------------------------------------------|--------------|-----------|--------------------|
| <a href="#">gi 21214752</a>                                                   | Mass: 206214 | Score: 29 | Queries matched: 5 |
| gag-pol polyprotein precursor; hypothetical protein [Drosophila melanogaster] |              |           |                    |
| <a href="#">gi 25009978</a>                                                   | Mass: 83774  | Score: 29 | Queries matched: 5 |
| GH06606p [Drosophila melanogaster]                                            |              |           |                    |

10. [gi|304728](#) Score: 28 Queries matched: 2  
transcription factor

 Check to include this hit in error tolerant search or archive report

|                                     | Query               | Observed | Mr (expt) | Mr (calc) | ppm  | Miss | Score | Expect | Rank | Peptide   |
|-------------------------------------|---------------------|----------|-----------|-----------|------|------|-------|--------|------|-----------|
| <input checked="" type="checkbox"/> | <a href="#">569</a> | 475.2880 | 474.2807  | 474.2802  | 1.12 | 0    | (25)  | 0.33   | 1    | K.SGIAK.Q |
| <input checked="" type="checkbox"/> | <a href="#">570</a> | 475.2881 | 474.2808  | 474.2802  | 1.27 | 0    | 28    | 0.15   | 1    | K.SGIAK.Q |

## Proteins matching the same set of peptides:

|                             |           |                    |
|-----------------------------|-----------|--------------------|
| <a href="#">gi 17737765</a> | Score: 28 | Queries matched: 2 |
| <a href="#">gi 28572995</a> | Score: 28 | Queries matched: 2 |
| <a href="#">gi 41616160</a> | Score: 28 | Queries matched: 2 |
| <a href="#">gi 62472391</a> | Score: 28 | Queries matched: 2 |
| <a href="#">gi 92109928</a> | Score: 28 | Queries matched: 2 |

11. [gi|19920576](#) Mass: 29241 Score: 26 Queries matched: 2 emPAI: 0.11  
CG3557-PA [Drosophila melanogaster]

Check to include this hit in error tolerant search or archive report

|                                     | Query                | Observed | Mr (expt) | Mr (calc) | ppm   | Miss | Score | Expect | Rank | Peptide      |
|-------------------------------------|----------------------|----------|-----------|-----------|-------|------|-------|--------|------|--------------|
| <input checked="" type="checkbox"/> | <a href="#">1991</a> | 572.3413 | 1142.6680 | 1142.6713 | -2.85 | 1    | (21)  | 0.094  | 1    | K.WLWTRLIR.G |
| <input checked="" type="checkbox"/> | <a href="#">1992</a> | 572.3413 | 1142.6681 | 1142.6713 | -2.75 | 1    | 26    | 0.033  | 1    | K.WLWTRLIR.G |

12. [gi|21429138](#) Mass: 24766 Score: 26 Queries matched: 1 emPAI: 0.14  
RE42508p [Drosophila melanogaster]

Check to include this hit in error tolerant search or archive report

|                                     | Query                | Observed  | Mr (expt) | Mr (calc) | ppm  | Miss | Score | Expect | Rank | Peptide       |
|-------------------------------------|----------------------|-----------|-----------|-----------|------|------|-------|--------|------|---------------|
| <input checked="" type="checkbox"/> | <a href="#">1945</a> | 1091.5658 | 1090.5585 | 1090.5553 | 2.96 | 2    | 26    | 0.036  | 1    | R.KMSLEDGRR.A |

## Proteins matching the same set of peptides:

|                                                       |             |           |                    |
|-------------------------------------------------------|-------------|-----------|--------------------|
| <a href="#">gi 116007254</a>                          | Mass: 21260 | Score: 26 | Queries matched: 1 |
| Rab21 CG17515-PA, isoform A [Drosophila melanogaster] |             |           |                    |

13. [gi|9799628](#) Score: 25 Queries matched: 2  
Nut2 [Drosophila melanogaster]

Check to include this hit in error tolerant search or archive report

| Query                                                    | Observed | Mr(expt) | Mr(calc) | ppm  | Miss | Score | Expect | Rank | Peptide    |
|----------------------------------------------------------|----------|----------|----------|------|------|-------|--------|------|------------|
| <input checked="" type="checkbox"/> <a href="#">1363</a> | 687.4418 | 686.4345 | 686.4326 | 2.69 | 1    | (25)  | 0.072  | 1    | K.IEGLKK.F |
| <input checked="" type="checkbox"/> <a href="#">1364</a> | 687.4433 | 686.4360 | 686.4326 | 4.95 | 1    | 25    | 0.064  | 1    | K.IEGLKK.F |

## Proteins matching the same set of peptides:

[gi|24665095](#)      Score: 25      Queries matched: 2

14. [gi|45550970](#)      Mass: 154737      Score: 25      Queries matched: 2      emPAI: 0.02  
CG5792-PB, isoform B [Drosophila melanogaster]

Check to include this hit in error tolerant search or archive report

| Query                                                    | Observed | Mr(expt) | Mr(calc) | ppm  | Miss | Score | Expect | Rank | Peptide     |
|----------------------------------------------------------|----------|----------|----------|------|------|-------|--------|------|-------------|
| <input checked="" type="checkbox"/> <a href="#">1717</a> | 432.7330 | 863.4514 | 863.4501 | 1.49 | 1    | (24)  | 0.062  | 1    | K.LEKFGDR.N |
| <input checked="" type="checkbox"/> <a href="#">1718</a> | 432.7330 | 863.4515 | 863.4501 | 1.56 | 1    | 25    | 0.049  | 1    | K.LEKFGDR.N |

## Proteins matching the same set of peptides:

[gi|90855623](#)      Mass: 130026      Score: 25      Queries matched: 2  
IP16022p [Drosophila melanogaster]

15. [gi|24644950](#)      Mass: 36839      Score: 25      Queries matched: 1  
CG2767-PA [Drosophila melanogaster]

Check to include this hit in error tolerant search or archive report

| Query                                                    | Observed | Mr(expt)  | Mr(calc)  | ppm  | Miss | Score | Expect | Rank | Peptide        |
|----------------------------------------------------------|----------|-----------|-----------|------|------|-------|--------|------|----------------|
| <input checked="" type="checkbox"/> <a href="#">1914</a> | 523.2861 | 1044.5576 | 1044.5564 | 1.19 | 0    | 25    | 0.062  | 1    | K.LSSLDQNI.R.I |

Peptide matches not assigned to protein hits: (no details means no match)

| Query                                                    | Observed | Mr(expt) | Mr(calc) | ppm   | Miss | Score | Expect  | Rank | Peptide                 |
|----------------------------------------------------------|----------|----------|----------|-------|------|-------|---------|------|-------------------------|
| <input checked="" type="checkbox"/> <a href="#">1292</a> | 660.3946 | 659.3874 | 659.3854 | 3.05  | 0    | 43    | 0.00085 | 1    | AEISLK                  |
| <input checked="" type="checkbox"/> <a href="#">1291</a> | 660.3943 | 659.3870 | 659.3854 | 2.55  | 0    | 38    | 0.0028  | 1    | AEISLK                  |
| <input checked="" type="checkbox"/> <a href="#">1556</a> | 394.7483 | 787.4820 | 787.4803 | 2.11  | 1    | 28    | 0.017   | 1    | LSALEKK                 |
| <a href="#">1669</a>                                     | 424.2139 | 846.4133 | 846.4157 | -2.79 | 0    | 24    | 0.023   | 1    | DPDLMLK + Oxidation (M) |

 **Mascot Search Results**

User : Julie Kadrmas; gel band: #63  
Email : 110223FT\_JulieKadrmas\_63  
Search title : NCBI Drosophila DB trypsin specific search: Oxidation (MHW)  
MS data file : C:\Documents and Settings\cnelson\Desktop\Merge Files\_2011\February\_2011\merge\_110223FT\_JulieKad  
Database : NCBIInr (5335292 sequences; 1845185051 residues)  
Taxonomy : Drosophila (fruit flies) (50248 sequences)  
Timestamp : 24 Feb 2011 at 19:14:32 GMT  
Protein hits : [gi|17137738](#) Rpt1 CG1341-PA [Drosophila melanogaster]  
[gi|20129399](#) Aldehyde dehydrogenase CG3752-PA [Drosophila melanogaster]  
[gi|24643390](#) CG32528-PA [Drosophila melanogaster]  
[gi|386043](#) tubulin alpha-2 chain {internal fragment} [Drosophila melanogaster, CME W2 wing imag  
[gi|1699220](#) D-ERp60=protein disulphide isomerase isoform/multifunctional endoplasmic reticulum l  
[gi|7946](#) unnamed protein product [Drosophila melanogaster]  
[gi|45552677](#) CG33456-PA [Drosophila melanogaster]  
[gi|3426089](#) polyprotein [Drosophila melanogaster]  
[gi|17946230](#) RE57556p [Drosophila melanogaster]  
[gi|24644950](#) CG2767-PA [Drosophila melanogaster]  
[gi|24648138](#) CG11779-PA, isoform A [Drosophila melanogaster]

**Probability Based Mowse Score**

Ions score is  $-10 \cdot \log(P)$ , where P is the probability that the observed match is a random event.

Individual ions scores  $> 23$  indicate identity or extensive homology ( $p < 0.05$ ).

Protein scores are derived from ions scores as a non-probabilistic basis for ranking protein hits.



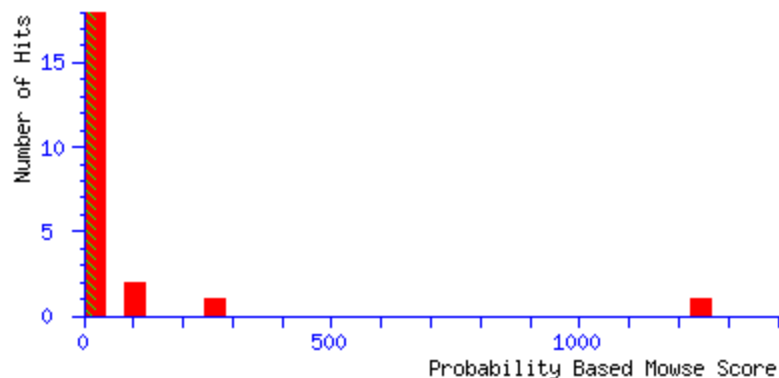

## Peptide Summary Report

Format As Peptide Summary [Help](#)

Significance threshold p<  Max. number of hits

Standard scoring  MudPIT scoring  Ions score or expect cut-off  Show sub-sets

Show pop-ups  Suppress pop-ups  Sort unassigned Decreasing Score  Require bold red

Error tolerant

1. [gi|17137738](#) Mass: 48511 Score: 1244 Queries matched: 34 emPAI: 6.68

Rpt1 CG1341-PA [Drosophila melanogaster]

Check to include this hit in error tolerant search or archive report

| Query                                                    | Observed | Mr (expt) | Mr (calc) | ppm  | Miss | Score | Expect  | Rank | Peptide                     |
|----------------------------------------------------------|----------|-----------|-----------|------|------|-------|---------|------|-----------------------------|
| <input checked="" type="checkbox"/> <a href="#">1621</a> | 646.3420 | 645.3347  | 645.3333  | 2.13 | 0    | 22    | 0.13    | 1    | K.EQIEK.L                   |
| <input checked="" type="checkbox"/> <a href="#">2122</a> | 456.2190 | 910.4235  | 910.4218  | 1.83 | 0    | 30    | 0.0052  | 1    | R.ELFEMAR.S + Oxidation (M) |
| <input checked="" type="checkbox"/> <a href="#">2123</a> | 456.2192 | 910.4238  | 910.4218  | 2.17 | 0    | (20)  | 0.053   | 1    | R.ELFEMAR.S + Oxidation (M) |
| <input checked="" type="checkbox"/> <a href="#">2124</a> | 456.2193 | 910.4241  | 910.4218  | 2.50 | 0    | (23)  | 0.026   | 1    | R.ELFEMAR.S + Oxidation (M) |
| <input checked="" type="checkbox"/> <a href="#">2158</a> | 481.2464 | 960.4783  | 960.4764  | 1.99 | 0    | 51    | 0.00017 | 1    | K.SIEEDIQK.A                |
| <input checked="" type="checkbox"/> <a href="#">2181</a> | 486.7908 | 971.5670  | 971.5651  | 1.91 | 0    | 52    | 0.00016 | 1    | R.VIGSELVQK.Y               |
| <a href="#">2209</a>                                     | 501.2860 | 1000.5575 | 1000.5553 | 2.23 | 0    | 40    | 0.0017  | 1    | K.QVNELTGIK.E               |



| Query                                                    | Observed | Mr(expt)  | Mr(calc)  | ppm  | Miss | Score | Expect   | Rank | Peptide             |
|----------------------------------------------------------|----------|-----------|-----------|------|------|-------|----------|------|---------------------|
| <input checked="" type="checkbox"/> <a href="#">2258</a> | 541.2808 | 1080.5470 | 1080.5452 | 1.73 | 0    | 52    | 0.0001   | 1    | K.VAFTGSTDVVGK.L    |
| <input checked="" type="checkbox"/> <a href="#">2402</a> | 717.3935 | 1432.7724 | 1432.7674 | 3.46 | 1    | 50    | 0.00017  | 1    | K.DLDKANYIVGGLR.A   |
| <input checked="" type="checkbox"/> <a href="#">2415</a> | 778.3935 | 1554.7725 | 1554.7678 | 3.02 | 0    | 86    | 4.5e-008 | 1    | R.ANNSEYGLAAAVFTK.D |
| <input checked="" type="checkbox"/> <a href="#">2446</a> | 597.2944 | 1788.8613 | 1788.8570 | 2.38 | 1    | (29)  | 0.017    | 1    | R.TFVEDKIYDEFVER.S  |
| <input checked="" type="checkbox"/> <a href="#">2447</a> | 895.4390 | 1788.8634 | 1788.8570 | 3.58 | 1    | 63    | 6.2e-006 | 1    | R.TFVEDKIYDEFVER.S  |

## Proteins matching the same set of peptides:

[gi|68051705](#) Mass: 61886 Score: 251 Queries matched: 5

GH22814p [Drosophila melanogaster]

[gi|125986975](#) Mass: 56964 Score: 251 Queries matched: 5

GA17661-PA [Drosophila pseudoobscura]

3. [gi|24643390](#) Mass: 41837 Score: 65 Queries matched: 1 emPAI: 0.08  
CG32528-PA [Drosophila melanogaster]

Check to include this hit in error tolerant search or archive report

| Query                                                    | Observed | Mr(expt)  | Mr(calc)  | ppm  | Miss | Score | Expect   | Rank | Peptide             |
|----------------------------------------------------------|----------|-----------|-----------|------|------|-------|----------|------|---------------------|
| <input checked="" type="checkbox"/> <a href="#">2422</a> | 805.4469 | 1608.8793 | 1608.8723 | 4.36 | 0    | 65    | 2.6e-006 | 1    | R.AVIDPQISIDPQVIK.L |

4. [gi|386043](#) Mass: 1687 Score: 63 Queries matched: 1 emPAI: 2.57  
tubulin alpha-2 chain {internal fragment} [Drosophila melanogaster, CME W2 wing imaginal disc cell line, Peptide]

Check to include this hit in error tolerant search or archive report

| Query                                                    | Observed | Mr(expt)  | Mr(calc)  | ppm  | Miss | Score | Expect | Rank | Peptide             |
|----------------------------------------------------------|----------|-----------|-----------|------|------|-------|--------|------|---------------------|
| <input checked="" type="checkbox"/> <a href="#">2429</a> | 844.4505 | 1686.8864 | 1686.8829 | 2.08 | 0    | 63    | 9e-006 | 1    | -.AVFVDLEPTVVDEVR.- |

## Proteins matching the same set of peptides:

[gi|17136564](#) Mass: 49876 Score: 63 Queries matched: 1

alpha-Tubulin at 84B CG1913-PA [Drosophila melanogaster]

[gi|17737821](#) Mass: 49859 Score: 63 Queries matched: 1

alpha-Tubulin at 84D CG2512-PA, isoform A [Drosophila melanogaster]

[gi|17865841](#)    **Mass:** 49935    **Score:** 63    **Queries matched:** 1  
alpha-Tubulin at 85E CG9476-PA [Drosophila melanogaster]  
[gi|21064813](#)    **Mass:** 50034    **Score:** 63    **Queries matched:** 1  
RH71862p [Drosophila melanogaster]  
[gi|38047815](#)    **Mass:** 28524    **Score:** 63    **Queries matched:** 1  
similar to Drosophila melanogaster alphaTub84B [Drosophila yakuba]

5.    [gi|1699220](#)    **Mass:** 55338    **Score:** 36    **Queries matched:** 1    **emPAI:** 0.06  
D-ERp60=protein disulphide isomerase isoform/multifunctional endoplasmic reticulum luminal polypeptide [Dros  
 Check to include this hit in error tolerant search or archive report

| Query                                                    | Observed | Mr(expt)  | Mr(calc)  | ppm  | Miss | Score | Expect | Rank | Peptide        |
|----------------------------------------------------------|----------|-----------|-----------|------|------|-------|--------|------|----------------|
| <input checked="" type="checkbox"/> <a href="#">2279</a> | 557.7929 | 1113.5713 | 1113.5706 | 0.63 | 0    | 36    | 0.0035 | 1    | K.YSVSGYPTLK.I |

**Proteins matching the same set of peptides:**

[gi|45551086](#)    **Mass:** 55336    **Score:** 36    **Queries matched:** 1  
ERp60 CG8983-PA, isoform A [Drosophila melanogaster]  
[gi|66804043](#)    **Mass:** 55334    **Score:** 36    **Queries matched:** 1  
Erp60 [Drosophila simulans]

6.    [gi|7946](#)    **Mass:** 46534    **Score:** 32    **Queries matched:** 1    **emPAI:** 0.07  
unnamed protein product [Drosophila melanogaster]  
 Check to include this hit in error tolerant search or archive report

| Query                                                    | Observed | Mr(expt)  | Mr(calc)  | ppm  | Miss | Score | Expect | Rank | Peptide         |
|----------------------------------------------------------|----------|-----------|-----------|------|------|-------|--------|------|-----------------|
| <input checked="" type="checkbox"/> <a href="#">2233</a> | 522.7832 | 1043.5518 | 1043.5499 | 1.85 | 0    | 32    | 0.0086 | 1    | R.IEEEEIGAGVK.F |

**Proteins matching the same set of peptides:**

[gi|17137654](#)    **Mass:** 46633    **Score:** 32    **Queries matched:** 1  
Enolase CG17654-PA, isoform A [Drosophila melanogaster]  
[gi|21392248](#)    **Mass:** 54304    **Score:** 32    **Queries matched:** 1  
SD23356p [Drosophila melanogaster]  
[gi|24580914](#)    **Mass:** 54276    **Score:** 32    **Queries matched:** 1  
Enolase CG17654-PB, isoform B [Drosophila melanogaster]

7. [gi|45552677](#) Mass: 74415 Score: 32 Queries matched: 1 emPAI: 0.04  
CG33456-PA [Drosophila melanogaster]

Check to include this hit in error tolerant search or archive report

| Query                                                    | Observed | Mr(expt)  | Mr(calc)  | ppm  | Miss | Score | Expect | Rank | Peptide       |
|----------------------------------------------------------|----------|-----------|-----------|------|------|-------|--------|------|---------------|
| <input checked="" type="checkbox"/> <a href="#">2244</a> | 530.7865 | 1059.5585 | 1059.5560 | 2.33 | 0    | 32    | 0.013  | 1    | R.TLIDQESVR.D |

8. [gi|3426089](#) Mass: 177601 Score: 32 Queries matched: 3 emPAI: 0.02  
polyprotein [Drosophila melanogaster]

Check to include this hit in error tolerant search or archive report

| Query                                                    | Observed | Mr(expt) | Mr(calc) | ppm  | Miss | Score | Expect | Rank | Peptide    |
|----------------------------------------------------------|----------|----------|----------|------|------|-------|--------|------|------------|
| <input checked="" type="checkbox"/> <a href="#">1715</a> | 672.4047 | 671.3974 | 671.3966 | 1.13 | 0    | (31)  | 0.01   | 1    | K.TVSLPR.L |
| <input checked="" type="checkbox"/> <a href="#">1716</a> | 672.4049 | 671.3976 | 671.3966 | 1.42 | 0    | (27)  | 0.028  | 1    | K.TVSLPR.L |
| <input checked="" type="checkbox"/> <a href="#">1718</a> | 672.4054 | 671.3981 | 671.3966 | 2.24 | 0    | 32    | 0.01   | 1    | K.TVSLPR.L |

Proteins matching the same set of peptides:

[gi|21214752](#) Mass: 206214 Score: 32 Queries matched: 3  
gag-pol polyprotein precursor; hypothetical protein [Drosophila melanogaster]

[gi|25009978](#) Mass: 83774 Score: 32 Queries matched: 3  
GH06606p [Drosophila melanogaster]

9. [gi|17946230](#) Mass: 43594 Score: 25 Queries matched: 1 emPAI: 0.08  
RE57556p [Drosophila melanogaster]

Check to include this hit in error tolerant search or archive report

| Query                                                    | Observed | Mr(expt) | Mr(calc) | ppm  | Miss | Score | Expect | Rank | Peptide     |
|----------------------------------------------------------|----------|----------|----------|------|------|-------|--------|------|-------------|
| <input checked="" type="checkbox"/> <a href="#">2076</a> | 866.4293 | 865.4220 | 865.4181 | 4.50 | 0    | 25    | 0.033  | 1    | K.EYADLQK.R |

Proteins matching the same set of peptides:

[gi|24584126](#) Mass: 43654 Score: 25 Queries matched: 1  
CG9267-PA [Drosophila melanogaster]

10. [gi|24644950](#) Mass: 36839 Score: 25 Queries matched: 2  
CG2767-PA [Drosophila melanogaster]  
 Check to include this hit in error tolerant search or archive report

| Query                                                    | Observed | Mr(expt)  | Mr(calc)  | ppm  | Miss | Score | Expect | Rank | Peptide       |
|----------------------------------------------------------|----------|-----------|-----------|------|------|-------|--------|------|---------------|
| <input checked="" type="checkbox"/> <a href="#">2235</a> | 523.2860 | 1044.5575 | 1044.5564 | 1.08 | 0    | 25    | 0.064  | 1    | K.LSSLDQNIK.I |
| <input checked="" type="checkbox"/> <a href="#">2236</a> | 523.2864 | 1044.5583 | 1044.5564 | 1.83 | 0    | (25)  | 0.065  | 1    | K.LSSLDQNIK.I |

11. [gi|24648138](#) Mass: 52842 Score: 25 Queries matched: 1 emPAI: 0.06  
CG11779-PA, isoform A [Drosophila melanogaster]  
 Check to include this hit in error tolerant search or archive report

| Query                                                    | Observed | Mr(expt) | Mr(calc) | ppm  | Miss | Score | Expect | Rank | Peptide     |
|----------------------------------------------------------|----------|----------|----------|------|------|-------|--------|------|-------------|
| <input checked="" type="checkbox"/> <a href="#">1961</a> | 787.4594 | 786.4522 | 786.4487 | 4.40 | 0    | 25    | 0.045  | 1    | R.GDLEILK.D |

**Proteins matching the same set of peptides:**

[gi|24648140](#) Mass: 48895 Score: 25 Queries matched: 1  
CG11779-PB, isoform B [Drosophila melanogaster]  
[gi|25009742](#) Mass: 52856 Score: 25 Queries matched: 1  
AT09326p [Drosophila melanogaster]  
[gi|63093891](#) Mass: 52816 Score: 25 Queries matched: 1  
hypothetical protein [Drosophila parabiopectinata]  
[gi|63093892](#) Mass: 48814 Score: 25 Queries matched: 1  
hypothetical protein [Drosophila parabiopectinata]  
[gi|78706782](#) Mass: 49345 Score: 25 Queries matched: 1  
CG11779-PC, isoform C [Drosophila melanogaster]  
[gi|125773847](#) Mass: 51199 Score: 25 Queries matched: 1  
GA11194-PA [Drosophila pseudoobscura]

Peptide matches not assigned to protein hits: (no details means no match)

| Query                                                    | Observed | Mr(expt)  | Mr(calc)  | ppm   | Miss | Score | Expect | Rank | Peptide     |
|----------------------------------------------------------|----------|-----------|-----------|-------|------|-------|--------|------|-------------|
| <input checked="" type="checkbox"/> <a href="#">2351</a> | 630.3420 | 1258.6695 | 1258.6710 | -1.22 | 0    | 22    | 0.1    | 1    | SLPFSPSHFLK |
| <a href="#">2042</a>                                     | 423.7203 | 845.4261  | 845.4243  | 2.14  | 0    | 21    | 0.13   | 1    | ALAEAESR    |

# **MASCOT** Mascot Search Results

User : Julie Kadrmas; gel band: #64  
Email : 110224FT\_JulieKadrmas\_64  
Search title : NCBI Drosophila DB trypsin specific search: Oxidation (MHW)  
MS data file : C:\Documents and Settings\cnelson\Desktop\Merge Files\_2011\February\_2011\merge\_110224FT\_JulieKad  
Database : NCBI Inr (5335292 sequences; 1845185051 residues)  
Taxonomy : Drosophila (fruit flies) (50248 sequences)  
Timestamp : 24 Feb 2011 at 19:39:26 GMT  
Protein hits : [gi|24643390](#) CG32528-PA [Drosophila melanogaster]  
[gi|62862344](#) CG10837-PB.3 [Drosophila melanogaster]  
[gi|3426089](#) polyprotein [Drosophila melanogaster]  
[gi|66771585](#) IP12293p [Drosophila melanogaster]  
[gi|63146399](#) rhino [Drosophila simulans]  
[gi|125811483](#) GA21181-PA [Drosophila pseudoobscura]

## Probability Based Mowse Score

Ions score is  $-10 \cdot \log(P)$ , where P is the probability that the observed match is a random event. Individual ions scores  $> 24$  indicate identity or extensive homology ( $p < 0.05$ ). Protein scores are derived from ions scores as a non-probabilistic basis for ranking protein hits.

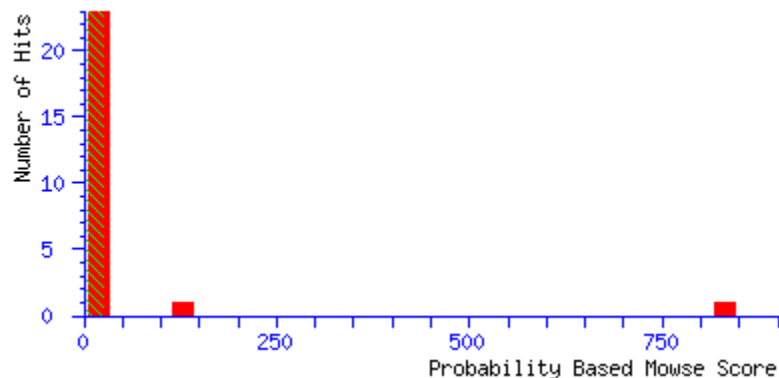

## Peptide Summary Report

Format As Peptide Summary[Help](#)Significance threshold p<  Max. number of hits Standard scoring  MudPIT scoring  Ions score or expect cut-off  Show sub-sets Show pop-ups  Suppress pop-ups  Sort unassigned Decreasing Score Require bold red  Error tolerant1. [gi|24643390](#) Mass: 41837 Score: 832 Queries matched: 21 emPAI: 3.57

CG32528-PA [Drosophila melanogaster]

 Check to include this hit in error tolerant search or archive report

| Query                                                    | Observed | Mr (expt) | Mr (calc) | ppm  | Miss | Score | Expect   | Rank | Peptide                           |
|----------------------------------------------------------|----------|-----------|-----------|------|------|-------|----------|------|-----------------------------------|
| <input checked="" type="checkbox"/> <a href="#">1589</a> | 350.2425 | 698.4704  | 698.4690  | 2.00 | 0    | 40    | 0.00037  | 1    | K.LNIVLK.A                        |
| <input checked="" type="checkbox"/> <a href="#">1590</a> | 699.4780 | 698.4708  | 698.4690  | 2.45 | 0    | (28)  | 0.0063   | 1    | K.LNIVLK.A                        |
| <input checked="" type="checkbox"/> <a href="#">1842</a> | 457.7573 | 913.5000  | 913.4981  | 2.06 | 0    | 33    | 0.0064   | 1    | K.NAGVLNAQK.F                     |
| <input checked="" type="checkbox"/> <a href="#">1848</a> | 461.2746 | 920.5346  | 920.5331  | 1.66 | 0    | 47    | 0.00019  | 1    | K.SLITFVNK.H                      |
| <input checked="" type="checkbox"/> <a href="#">1887</a> | 500.7650 | 999.5155  | 999.5138  | 1.76 | 0    | 49    | 9.5e-005 | 1    | K.WSVASVHVK.N                     |
| <input checked="" type="checkbox"/> <a href="#">1919</a> | 525.3225 | 1048.6305 | 1048.6281 | 2.29 | 1    | 56    | 1.2e-005 | 1    | K.KSLITFVNK.H                     |
| <input checked="" type="checkbox"/> <a href="#">1980</a> | 417.8921 | 1250.6545 | 1250.6520 | 2.02 | 0    | 36    | 0.0036   | 1    | K.AVNHTLGFHQK.I                   |
| <input checked="" type="checkbox"/> <a href="#">1981</a> | 626.3352 | 1250.6558 | 1250.6520 | 3.03 | 0    | (36)  | 0.0045   | 1    | K.AVNHTLGFHQK.I                   |
| <input checked="" type="checkbox"/> <a href="#">1985</a> | 646.8401 | 1291.6657 | 1291.6635 | 1.70 | 0    | 80    | 1.5e-007 | 1    | R.VLYSLFTMFR.D + Oxidation (M)    |
| <input checked="" type="checkbox"/> <a href="#">1996</a> | 456.8869 | 1367.6390 | 1367.6357 | 2.37 | 2    | 27    | 0.022    | 1    | K.KGEKEDSFWDK.F                   |
| <input checked="" type="checkbox"/> <a href="#">1999</a> | 472.9110 | 1415.7111 | 1415.7078 | 2.28 | 0    | (42)  | 0.00083  | 1    | K.ARPEDIVNMDLK.S + Oxidation (M)  |
| <input checked="" type="checkbox"/> <a href="#">2000</a> | 708.8635 | 1415.7124 | 1415.7078 | 3.20 | 0    | 48    | 0.00024  | 1    | K.ARPEDIVNMDLK.S + Oxidation (M)  |
| <input checked="" type="checkbox"/> <a href="#">2012</a> | 779.4503 | 1556.8861 | 1556.8814 | 3.01 | 0    | 69    | 9e-007   | 1    | R.LPENVFVTVIAEK.N                 |
| <input checked="" type="checkbox"/> <a href="#">2018</a> | 537.2992 | 1608.8757 | 1608.8723 | 2.10 | 0    | (57)  | 2.5e-005 | 1    | R.AVIDPQSISDPQVIK.L               |
| <input checked="" type="checkbox"/> <a href="#">2019</a> | 805.4462 | 1608.8778 | 1608.8723 | 3.42 | 0    | 67    | 2e-006   | 1    | R.AVIDPQSISDPQVIK.L               |
| <input checked="" type="checkbox"/> <a href="#">2020</a> | 805.4467 | 1608.8789 | 1608.8723 | 4.14 | 0    | (64)  | 3.5e-006 | 1    | R.AVIDPQSISDPQVIK.L               |
| <input checked="" type="checkbox"/> <a href="#">2030</a> | 857.4455 | 1712.8765 | 1712.8733 | 1.83 | 0    | 82    | 9.7e-008 | 1    | R.ILVDWINDELAEQR.I                |
| <input checked="" type="checkbox"/> <a href="#">2038</a> | 924.4119 | 1846.8092 | 1846.8043 | 2.62 | 0    | 98    | 7.6e-010 | 1    | K.FQEITSEYDDLGMRC + Oxidation (M) |
| <input checked="" type="checkbox"/> <a href="#">2039</a> | 616.6106 | 1846.8099 | 1846.8043 | 2.99 | 0    | (65)  | 1.9e-006 | 1    | K.FQEITSEYDDLGMRC + Oxidation (M) |
| <input type="checkbox"/> <a href="#">2051</a>            | 651.3306 | 1950.9699 | 1950.9647 | 2.68 | 1    | 66    | 4.1e-006 | 1    | K.KLDVPEVTQSEGGHEK.L              |



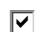 [2064](#) **728.3658** **2182.0755** **2182.0728** **1.23** **0** **34** **0.0072** **1** **R.IIVQHLEEDMYDGQVLHK.L + Oxidation (M**2. [gi|62862344](#) **Mass:** 52171 **Score:** 131 **Queries matched:** 3 **emPAI:** 0.20  
CG10837-PB.3 [Drosophila melanogaster] Check to include this hit in error tolerant search or archive report

| Query                                                    | Observed        | Mr (expt)        | Mr (calc)        | ppm         | Miss     | Score     | Expect          | Rank     | Peptide                  |
|----------------------------------------------------------|-----------------|------------------|------------------|-------------|----------|-----------|-----------------|----------|--------------------------|
| <input checked="" type="checkbox"/> <a href="#">1845</a> | <b>458.7419</b> | <b>915.4692</b>  | <b>915.4661</b>  | <b>3.37</b> | <b>0</b> | <b>23</b> | <b>0.055</b>    | <b>1</b> | <b>R.ELEIEQR.L</b>       |
| <input checked="" type="checkbox"/> <a href="#">2002</a> | <b>716.8398</b> | <b>1431.6650</b> | <b>1431.6590</b> | <b>4.22</b> | <b>0</b> | <b>83</b> | <b>6.2e-008</b> | <b>1</b> | <b>R.IELSNENDQQR.Q</b>   |
| <input checked="" type="checkbox"/> <a href="#">2015</a> | <b>528.2625</b> | <b>1581.7657</b> | <b>1581.7634</b> | <b>1.44</b> | <b>2</b> | <b>25</b> | <b>0.047</b>    | <b>1</b> | <b>R.TNQDYKESDKINK.C</b> |

**Proteins matching the same set of peptides:**[gi|62862346](#) **Mass:** 44097 **Score:** 131 **Queries matched:** 3

CG10837-PE.3 [Drosophila melanogaster]

[gi|62862348](#) **Mass:** 44197 **Score:** 131 **Queries matched:** 3

CG10837-PA.3 [Drosophila melanogaster]

3. [gi|3426089](#) **Mass:** 177601 **Score:** 31 **Queries matched:** 3 **emPAI:** 0.02  
polyprotein [Drosophila melanogaster] Check to include this hit in error tolerant search or archive report

| Query                                                    | Observed        | Mr (expt)       | Mr (calc)       | ppm         | Miss     | Score       | Expect       | Rank     | Peptide           |
|----------------------------------------------------------|-----------------|-----------------|-----------------|-------------|----------|-------------|--------------|----------|-------------------|
| <input checked="" type="checkbox"/> <a href="#">1530</a> | <b>672.4047</b> | <b>671.3974</b> | <b>671.3966</b> | <b>1.13</b> | <b>0</b> | <b>(27)</b> | <b>0.029</b> | <b>1</b> | <b>K.TVSLPR.L</b> |
| <input checked="" type="checkbox"/> <a href="#">1531</a> | <b>672.4047</b> | <b>671.3974</b> | <b>671.3966</b> | <b>1.18</b> | <b>0</b> | <b>31</b>   | <b>0.01</b>  | <b>1</b> | <b>K.TVSLPR.L</b> |
| <input checked="" type="checkbox"/> <a href="#">1532</a> | <b>672.4049</b> | <b>671.3977</b> | <b>671.3966</b> | <b>1.55</b> | <b>0</b> | <b>(31)</b> | <b>0.01</b>  | <b>1</b> | <b>K.TVSLPR.L</b> |

**Proteins matching the same set of peptides:**[gi|21214752](#) **Mass:** 206214 **Score:** 31 **Queries matched:** 3

gag-pol polyprotein precursor; hypothetical protein [Drosophila melanogaster]

[gi|25009978](#) **Mass:** 83774 **Score:** 31 **Queries matched:** 3

GH06606p [Drosophila melanogaster]

4. [gi|66771585](#) Mass: 7369 Score: 31 Queries matched: 1 emPAI: 0.48  
IP12293p [Drosophila melanogaster]

Check to include this hit in error tolerant search or archive report

| Query                                                    | Observed | Mr(expt) | Mr(calc) | ppm  | Miss | Score | Expect | Rank | Peptide                   |
|----------------------------------------------------------|----------|----------|----------|------|------|-------|--------|------|---------------------------|
| <input checked="" type="checkbox"/> <a href="#">1732</a> | 401.7252 | 801.4359 | 801.4345 | 1.85 | 1    | 31    | 0.026  | 1    | K.DLGRTL <del>A</del> G.- |

5. [gi|63146399](#) Mass: 55283 Score: 25 Queries matched: 1  
rhino [Drosophila simulans]

Check to include this hit in error tolerant search or archive report

| Query                                                    | Observed | Mr(expt) | Mr(calc) | ppm  | Miss | Score | Expect | Rank | Peptide      |
|----------------------------------------------------------|----------|----------|----------|------|------|-------|--------|------|--------------|
| <input checked="" type="checkbox"/> <a href="#">1773</a> | 845.4495 | 844.4422 | 844.4403 | 2.35 | 1    | 25    | 0.053  | 1    | K.SSSPPKSR.G |

6. [gi|125811483](#) Mass: 144257 Score: 25 Queries matched: 1 emPAI: 0.02  
GA21181-PA [Drosophila pseudoobscura]

Check to include this hit in error tolerant search or archive report

| Query                                                    | Observed | Mr(expt) | Mr(calc) | ppm  | Miss | Score | Expect | Rank | Peptide                     |
|----------------------------------------------------------|----------|----------|----------|------|------|-------|--------|------|-----------------------------|
| <input checked="" type="checkbox"/> <a href="#">1400</a> | 628.3429 | 627.3356 | 627.3340 | 2.56 | 0    | 25    | 0.051  | 1    | R.AHGISK.Q + Oxidation (HW) |

Peptide matches not assigned to protein hits: (no details means no match)

| Query                                                    | Observed | Mr(expt)  | Mr(calc)  | ppm   | Miss | Score | Expect | Rank | Peptide                    |
|----------------------------------------------------------|----------|-----------|-----------|-------|------|-------|--------|------|----------------------------|
| <input checked="" type="checkbox"/> <a href="#">1852</a> | 466.7444 | 931.4742  | 931.4770  | -3.04 | 2    | 24    | 0.072  | 1    | ACSPRRSR                   |
| <input checked="" type="checkbox"/> <a href="#">1856</a> | 466.7448 | 931.4751  | 931.4770  | -2.02 | 2    | 23    | 0.098  | 1    | ACSPRRSR                   |
| <input checked="" type="checkbox"/> <a href="#">1921</a> | 530.7869 | 1059.5592 | 1059.5560 | 3.03  | 0    | 23    | 0.1    | 1    | TLIDQESVR                  |
| <input checked="" type="checkbox"/> <a href="#">1763</a> | 416.7486 | 831.4826  | 831.4814  | 1.42  | 0    | 21    | 0.096  | 1    | SLSLSLGR                   |
| <input checked="" type="checkbox"/> <a href="#">1778</a> | 846.4351 | 845.4278  | 845.4243  | 4.14  | 0    | 21    | 0.15   | 1    | NNLDSVGK                   |
| <input checked="" type="checkbox"/> <a href="#">1772</a> | 423.2281 | 844.4417  | 844.4443  | -3.09 | 0    | 20    | 0.16   | 1    | SPALWGSK                   |
| <input checked="" type="checkbox"/> <a href="#">1290</a> | 586.3934 | 585.3861  | 585.3850  | 1.93  | 0    | 20    | 0.11   | 1    | GIGVIK                     |
| <input checked="" type="checkbox"/> <a href="#">1240</a> | 573.3362 | 572.3289  | 572.3282  | 1.25  | 0    | 20    | 0.34   | 1    | INAQK                      |
| <input checked="" type="checkbox"/> <a href="#">1898</a> | 510.7725 | 1019.5305 | 1019.5321 | -1.64 | 0    | 20    | 0.16   | 1    | AIMVGTVGEK + Oxidation (M) |

 **Mascot Search Results**

User : Julie Kadrmas; gel band: #66  
Email : 110224FT\_JulieKadrmas\_66  
Search title : NCBI Drosophila DB trypsin specific search: Oxidation (MHW)  
MS data file : C:\Documents and Settings\cnelson\Desktop\Merge Files\_2011\February\_2011\merge\_110224FT\_JulieKad  
Database : NCBIInr (5335292 sequences; 1845185051 residues)  
Taxonomy : Drosophila (fruit flies) (50248 sequences)  
Timestamp : 25 Feb 2011 at 18:43:33 GMT  
Protein hits : [gi|21357547](#) CG8863-PA, isoform A [Drosophila melanogaster]  
[gi|158767](#) ubiquitin  
[gi|157891](#) myosin heavy chain  
[gi|3426089](#) polyprotein [Drosophila melanogaster]  
[gi|3915856](#) 40S ribosomal protein S3a (C3 protein)  
[gi|1150726](#) transcription factor  
[gi|41619832](#) TPA: TPA\_inf: HDC15749 [Drosophila melanogaster]  
[gi|45552677](#) CG33456-PA [Drosophila melanogaster]  
[gi|125982242](#) GA22115-PA [Drosophila pseudoobscura]  
[gi|19922798](#) CG3085-PA [Drosophila melanogaster]  
[gi|24668309](#) CG11248-PA, isoform A [Drosophila melanogaster]

**Probability Based Mowse Score**

Ions score is  $-10 \cdot \log(P)$ , where P is the probability that the observed match is a random event.

Individual ions scores  $> 23$  indicate identity or extensive homology ( $p < 0.05$ ).

Protein scores are derived from ions scores as a non-probabilistic basis for ranking protein hits.

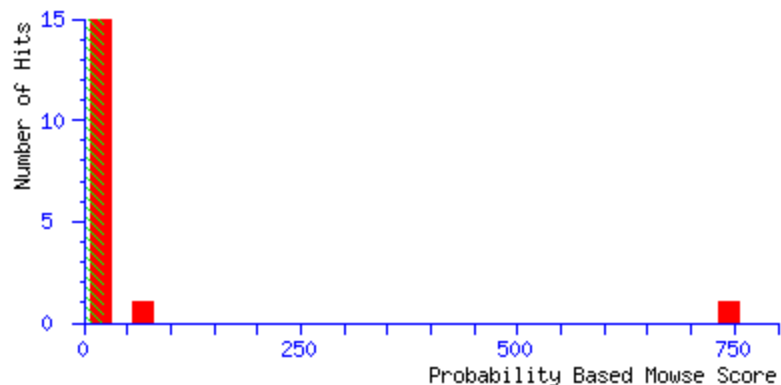

## Peptide Summary Report

Format As Peptide Summary [Help](#)

Significance threshold p<  Max. number of hits

Standard scoring  MudPIT scoring  Ions score or expect cut-off  Show sub-sets

Show pop-ups  Suppress pop-ups  Sort unassigned  Require bold red

Error tolerant

1. [gi|21357547](#) **Mass:** 45202 **Score:** 743 **Queries matched:** 24 **emPAI:** 2.82  
 CG8863-PA, isoform A [Drosophila melanogaster]

Check to include this hit in error tolerant search or archive report

| Query                                                    | Observed | Mr (expt) | Mr (calc) | ppm  | Miss | Score | Expect   | Rank | Peptide           |
|----------------------------------------------------------|----------|-----------|-----------|------|------|-------|----------|------|-------------------|
| <input checked="" type="checkbox"/> <a href="#">2430</a> | 379.2510 | 756.4875  | 756.4857  | 2.27 | 1    | 30    | 0.022    | 1    | R.KLQLQK.N        |
| <input checked="" type="checkbox"/> <a href="#">2785</a> | 483.7856 | 965.5567  | 965.5546  | 2.22 | 0    | 45    | 0.00019  | 1    | K.VLEVHIEK.G      |
| <input checked="" type="checkbox"/> <a href="#">2878</a> | 365.5578 | 1093.6516 | 1093.6495 | 1.88 | 1    | (31)  | 0.003    | 1    | R.KVLEVHIEK.G     |
| <input checked="" type="checkbox"/> <a href="#">2879</a> | 547.8334 | 1093.6523 | 1093.6495 | 2.50 | 1    | 39    | 0.00056  | 1    | R.KVLEVHIEK.G     |
| <input checked="" type="checkbox"/> <a href="#">2928</a> | 587.2765 | 1172.5384 | 1172.5363 | 1.77 | 0    | 57    | 1.2e-005 | 1    | K.FFGAGFGGSGGGR.R |
| <input checked="" type="checkbox"/> <a href="#">2994</a> | 640.3137 | 1278.6129 | 1278.6092 | 2.91 | 0    | 62    | 6.3e-006 | 1    | R.QVYDEGGEAAIK.K  |
| <a href="#">3034</a>                                     | 469.9095 | 1406.7067 | 1406.7041 | 1.83 | 1    | (55)  | 4.6e-005 | 1    | R.QVYDEGGEAAIKK.G |

|                                     |                      |          |           |           |      |   |      |          |   |                                        |  |  |
|-------------------------------------|----------------------|----------|-----------|-----------|------|---|------|----------|---|----------------------------------------|--|--|
| <input checked="" type="checkbox"/> |                      |          |           |           |      |   |      |          |   |                                        |  |  |
| <input checked="" type="checkbox"/> | <a href="#">3035</a> | 704.3610 | 1406.7074 | 1406.7041 | 2.30 | 1 | 63   | 7.9e-006 | 1 | R.QVYDEGGEEAAIKK.G                     |  |  |
| <input checked="" type="checkbox"/> | <a href="#">3041</a> | 714.3345 | 1426.6545 | 1426.6477 | 4.75 | 1 | 23   | 0.044    | 1 | K.YHPDKNPNEGEK.F                       |  |  |
| <input checked="" type="checkbox"/> | <a href="#">3092</a> | 555.9539 | 1664.8397 | 1664.8369 | 1.69 | 1 | (30) | 0.023    | 1 | K.AISQAYEVLSDADKR.Q                    |  |  |
| <input checked="" type="checkbox"/> | <a href="#">3093</a> | 833.4276 | 1664.8406 | 1664.8369 | 2.21 | 1 | (74) | 9.5e-007 | 1 | K.AISQAYEVLSDADKR.Q                    |  |  |
| <input checked="" type="checkbox"/> | <a href="#">3094</a> | 833.4284 | 1664.8422 | 1664.8369 | 3.16 | 1 | 87   | 5e-008   | 1 | K.AISQAYEVLSDADKR.Q                    |  |  |
| <input checked="" type="checkbox"/> | <a href="#">3105</a> | 851.9160 | 1701.8174 | 1701.8111 | 3.74 | 2 | 21   | 0.12     | 1 | K.YHPDKNPNEGEKFK.A                     |  |  |
| <input checked="" type="checkbox"/> | <a href="#">3106</a> | 852.8282 | 1703.6419 | 1703.6369 | 2.93 | 0 | 82   | 6.8e-009 | 1 | R.MAYDEDDGGYQDGPR.V + Oxidation (M)    |  |  |
| <input checked="" type="checkbox"/> | <a href="#">3138</a> | 618.3261 | 1851.9565 | 1851.9479 | 4.67 | 2 | 31   | 0.013    | 1 | K.LALKYHPDKNPNEGEK.F                   |  |  |
| <input checked="" type="checkbox"/> | <a href="#">3140</a> | 635.9423 | 1904.8050 | 1904.7999 | 2.63 | 1 | 34   | 0.00083  | 1 | K.GGADSGDFRNPMDFFEK.F + Oxidation (M)  |  |  |
| <input checked="" type="checkbox"/> | <a href="#">3141</a> | 635.9429 | 1904.8070 | 1904.7999 | 3.69 | 1 | (27) | 0.0059   | 1 | K.GGADSGDFRNPMDFFEK.F + Oxidation (M)  |  |  |
| <input checked="" type="checkbox"/> | <a href="#">3167</a> | 676.3653 | 2026.0742 | 2026.0695 | 2.30 | 1 | 33   | 0.0047   | 1 | K.TLDDRD LIVSTQPGEVIR.H                |  |  |
| <input checked="" type="checkbox"/> | <a href="#">3168</a> | 678.6398 | 2032.8977 | 2032.8949 | 1.36 | 2 | (20) | 0.066    | 1 | K.KGGADSGDFRNPMDFFEK.F + Oxidation (M) |  |  |
| <input checked="" type="checkbox"/> | <a href="#">3169</a> | 678.6418 | 2032.9037 | 2032.8949 | 4.34 | 2 | 32   | 0.0051   | 1 | K.KGGADSGDFRNPMDFFEK.F + Oxidation (M) |  |  |
| <input checked="" type="checkbox"/> | <a href="#">3226</a> | 797.3996 | 2389.1770 | 2389.1696 | 3.08 | 1 | 49   | 0.00026  | 1 | R.GKDVVHQMSVQLEELYNGATR.K + Oxidation  |  |  |
| <input checked="" type="checkbox"/> | <a href="#">3234</a> | 885.1814 | 2652.5224 | 2652.5142 | 3.06 | 0 | 28   | 0.0028   | 1 | K.GTLIIQFEVIFPEVINPSVPTLK.Q            |  |  |
| <input checked="" type="checkbox"/> | <a href="#">3235</a> | 890.4575 | 2668.3505 | 2668.3490 | 0.57 | 2 | (24) | 0.077    | 1 | K.TLDDRD LIVSTQPGEVIRHEMTK.C + Oxidati |  |  |
| <input checked="" type="checkbox"/> | <a href="#">3236</a> | 890.4596 | 2668.3569 | 2668.3490 | 2.93 | 2 | 32   | 0.01     | 1 | K.TLDDRD LIVSTQPGEVIRHEMTK.C + Oxidati |  |  |

2. [gi|158767](#) Mass: 8540 Score: 45 Queries matched: 1 emPAI: 0.41  
ubiquitin

Check to include this hit in error tolerant search or archive report

| Query                                                    | Observed | Mr(expt)  | Mr(calc)  | ppm  | Miss | Score | Expect  | Rank | Peptide              |
|----------------------------------------------------------|----------|-----------|-----------|------|------|-------|---------|------|----------------------|
| <input checked="" type="checkbox"/> <a href="#">3126</a> | 894.4700 | 1786.9255 | 1786.9200 | 3.04 | 0    | 45    | 0.00089 | 1    | K.TITLEVEPSDTIENVK.A |

Proteins matching the same set of peptides:

[gi|158769](#) Mass: 8428 Score: 45 Queries matched: 1

ubiquitin

[gi|158771](#) Mass: 8543 Score: 45 Queries matched: 1

ubiquitin

[gi|17136570](#) Mass: 14720 Score: 45 Queries matched: 1

Ribosomal protein L40 CG2960-PA [Drosophila melanogaster]

[gi|17136574](#)    **Mass:** 17929    **Score:** 45    **Queries matched:** 1  
 Ribosomal protein S27A CG5271-PA [Drosophila melanogaster]

[gi|51701919](#)    **Mass:** 8560    **Score:** 45    **Queries matched:** 1  
 Ubiquitin

[gi|158763](#)    **Score:** 43    **Queries matched:** 1  
[gi|158765](#)    **Score:** 43    **Queries matched:** 1  
[gi|225319](#)    **Score:** 43    **Queries matched:** 1  
[gi|225320](#)    **Score:** 43    **Queries matched:** 1

[gi|24640094](#)    **Mass:** 34314    **Score:** 43    **Queries matched:** 1  
 CG11700-PA [Drosophila melanogaster]

[gi|158753](#)    **Mass:** 25955    **Score:** 42    **Queries matched:** 1  
 ubiquitin

[gi|21428336](#)    **Mass:** 34369    **Score:** 42    **Queries matched:** 1  
 GH17513p [Drosophila melanogaster]

[gi|24640086](#)    **Mass:** 59993    **Score:** 40    **Queries matched:** 1  
 CG32744-PA [Drosophila melanogaster]

[gi|24657014](#)    **Mass:** 85746    **Score:** 39    **Queries matched:** 1  
 Ubiquitin-63E CG11624-PA, isoform A [Drosophila melanogaster]

[gi|21429768](#)    **Mass:** 119913    **Score:** 39    **Queries matched:** 1  
 AT20865p [Drosophila melanogaster]

3. [gi|157891](#)    **Mass:** 224288    **Score:** 31    **Queries matched:** 1    **emPAI:** 0.01  
 myosin heavy chain

Check to include this hit in error tolerant search or archive report

| Query                                                    | Observed | Mr(expt) | Mr(calc) | ppm  | Miss | Score | Expect | Rank | Peptide     |
|----------------------------------------------------------|----------|----------|----------|------|------|-------|--------|------|-------------|
| <input checked="" type="checkbox"/> <a href="#">2530</a> | 819.3864 | 818.3791 | 818.3770 | 2.59 | 0    | 31    | 0.0089 | 1    | R.LADEESR.E |

**Proteins matching the same set of peptides:**

[gi|157892](#)    **Mass:** 224488    **Score:** 31    **Queries matched:** 1  
 myosin heavy chain

[gi|2546936](#)    **Mass:** 135522    **Score:** 31    **Queries matched:** 1  
 muscle myosin heavy chain [Drosophila melanogaster]

[gi|2546937](#)    **Mass:** 135517    **Score:** 31    **Queries matched:** 1  
 muscle myosin heavy chain [Drosophila melanogaster]

[gi|2546938](#) **Mass:** 138464 **Score:** 31 **Queries matched:** 1  
muscle myosin heavy chain [Drosophila melanogaster]

[gi|2546939](#) **Mass:** 138459 **Score:** 31 **Queries matched:** 1  
muscle myosin heavy chain [Drosophila melanogaster]

[gi|7579901](#) **Mass:** 44936 **Score:** 31 **Queries matched:** 1  
myosin heavy chain; MHC [Drosophila melanogaster]

[gi|24584692](#) **Mass:** 224278 **Score:** 31 **Queries matched:** 1  
Myosin heavy chain CG17927-PC, isoform C [Drosophila melanogaster]

[gi|24584694](#) **Mass:** 224395 **Score:** 31 **Queries matched:** 1  
Myosin heavy chain CG17927-PG, isoform G [Drosophila melanogaster]

[gi|24584696](#) **Mass:** 224496 **Score:** 31 **Queries matched:** 1  
Myosin heavy chain CG17927-PE, isoform E [Drosophila melanogaster]

[gi|24584698](#) **Mass:** 224269 **Score:** 31 **Queries matched:** 1  
Myosin heavy chain CG17927-PJ, isoform J [Drosophila melanogaster]

[gi|24584700](#) **Mass:** 224391 **Score:** 31 **Queries matched:** 1  
Myosin heavy chain CG17927-PF, isoform F [Drosophila melanogaster]

[gi|24584702](#) **Mass:** 224355 **Score:** 31 **Queries matched:** 1  
Myosin heavy chain CG17927-PD, isoform D [Drosophila melanogaster]

[gi|24584704](#) **Mass:** 224472 **Score:** 31 **Queries matched:** 1  
Myosin heavy chain CG17927-PA, isoform A [Drosophila melanogaster]

[gi|24584706](#) **Mass:** 224456 **Score:** 31 **Queries matched:** 1  
Myosin heavy chain CG17927-PI, isoform I [Drosophila melanogaster]

[gi|24584710](#) **Mass:** 224272 **Score:** 31 **Queries matched:** 1  
Myosin heavy chain CG17927-PB, isoform B [Drosophila melanogaster]

[gi|24584712](#) **Mass:** 221271 **Score:** 31 **Queries matched:** 1  
Myosin heavy chain CG17927-PK, isoform K [Drosophila melanogaster]

[gi|24584714](#) **Mass:** 221339 **Score:** 31 **Queries matched:** 1  
Myosin heavy chain CG17927-PL, isoform L [Drosophila melanogaster]

[gi|24584716](#) **Mass:** 221330 **Score:** 31 **Queries matched:** 1  
Myosin heavy chain CG17927-PM, isoform M [Drosophila melanogaster]

[gi|28574239](#) **Mass:** 224573 **Score:** 31 **Queries matched:** 1  
Myosin heavy chain CG17927-PH, isoform H [Drosophila melanogaster]

---

4. [gi|3426089](#) **Mass:** 177601 **Score:** 29 **Queries matched:** 4 **emPAI:** 0.02  
polyprotein [Drosophila melanogaster]

Check to include this hit in error tolerant search or archive report

| Query                                                    | Observed | Mr(expt) | Mr(calc) | ppm  | Miss | Score | Expect | Rank | Peptide    |
|----------------------------------------------------------|----------|----------|----------|------|------|-------|--------|------|------------|
| <input checked="" type="checkbox"/> <a href="#">2177</a> | 672.4046 | 671.3974 | 671.3966 | 1.09 | 0    | (27)  | 0.028  | 1    | K.TVSLPR.L |
| <input checked="" type="checkbox"/> <a href="#">2178</a> | 672.4051 | 671.3978 | 671.3966 | 1.82 | 0    | 29    | 0.02   | 1    | K.TVSLPR.L |
| <input checked="" type="checkbox"/> <a href="#">2180</a> | 672.4052 | 671.3980 | 671.3966 | 2.00 | 0    | (23)  | 0.079  | 1    | K.TVSLPR.L |
| <input checked="" type="checkbox"/> <a href="#">2181</a> | 672.4055 | 671.3982 | 671.3966 | 2.37 | 0    | (28)  | 0.022  | 1    | K.TVSLPR.L |

**Proteins matching the same set of peptides:**

[gi|21214752](#) Mass: 206214 Score: 29 Queries matched: 4  
gag-pol polyprotein precursor; hypothetical protein [Drosophila melanogaster]  
[gi|25009978](#) Mass: 83774 Score: 29 Queries matched: 4  
GH06606p [Drosophila melanogaster]

---

5. [gi|3915856](#) Mass: 30337 Score: 28 Queries matched: 1 emPAI: 0.11  
40S ribosomal protein S3a (C3 protein)

Check to include this hit in error tolerant search or archive report

| Query                                                    | Observed | Mr(expt) | Mr(calc) | ppm  | Miss | Score | Expect | Rank | Peptide     |
|----------------------------------------------------------|----------|----------|----------|------|------|-------|--------|------|-------------|
| <input checked="" type="checkbox"/> <a href="#">2510</a> | 405.2244 | 808.4342 | 808.4330 | 1.48 | 0    | 28    | 0.014  | 1    | R.IASDYLK.G |

**Proteins matching the same set of peptides:**

[gi|17864162](#) Mass: 30321 Score: 28 Queries matched: 1  
Ribosomal protein S3A CG2168-PA, isoform A [Drosophila melanogaster]  
[gi|17945018](#) Mass: 25085 Score: 28 Queries matched: 1  
RE04220p [Drosophila melanogaster]  
[gi|38047857](#) Mass: 30307 Score: 28 Queries matched: 1  
similar to Drosophila melanogaster RpS3A [Drosophila yakuba]  
[gi|38048393](#) Mass: 25024 Score: 28 Queries matched: 1  
similar to Drosophila melanogaster RpS3A [Drosophila yakuba]  
[gi|126002490](#) Mass: 30307 Score: 28 Queries matched: 1  
GA15280-PA [Drosophila pseudoobscura]

---

6. [gi|1150726](#) Mass: 112844 Score: 26 Queries matched: 1  
transcription factor



Check to include this hit in error tolerant search or archive report

| Query                                                    | Observed | Mr(expt) | Mr(calc) | ppm  | Miss | Score | Expect | Rank | Peptide      |
|----------------------------------------------------------|----------|----------|----------|------|------|-------|--------|------|--------------|
| <input checked="" type="checkbox"/> <a href="#">2556</a> | 416.2510 | 830.4874 | 830.4862 | 1.55 | 0    | 26    | 0.067  | 1    | R.SLVVANTK.T |

Proteins matching the same set of peptides:

[gi|24664166](#) Mass: 112804 Score: 26 Queries matched: 1  
stonewall CG3836-PA [Drosophila melanogaster]

[gi|125979313](#) Mass: 107544 Score: 26 Queries matched: 1  
GA17720-PA [Drosophila pseudoobscura]

---

7. [gi|41619832](#) Mass: 27811 Score: 24 Queries matched: 1 emPAI: 0.12  
TPA: TPA\_inf: HDC15749 [Drosophila melanogaster]

Check to include this hit in error tolerant search or archive report

| Query                                                    | Observed | Mr(expt)  | Mr(calc)  | ppm   | Miss | Score | Expect | Rank | Peptide                        |
|----------------------------------------------------------|----------|-----------|-----------|-------|------|-------|--------|------|--------------------------------|
| <input checked="" type="checkbox"/> <a href="#">2870</a> | 541.7511 | 1081.4877 | 1081.4896 | -1.75 | 1    | 24    | 0.034  | 1    | K.MEMEKVQR.V + 2 Oxidation (M) |

---

8. [gi|45552677](#) Mass: 74415 Score: 24 Queries matched: 1 emPAI: 0.04  
CG33456-PA [Drosophila melanogaster]

Check to include this hit in error tolerant search or archive report

| Query                                                    | Observed | Mr(expt)  | Mr(calc)  | ppm  | Miss | Score | Expect | Rank | Peptide       |
|----------------------------------------------------------|----------|-----------|-----------|------|------|-------|--------|------|---------------|
| <input checked="" type="checkbox"/> <a href="#">2858</a> | 530.7866 | 1059.5587 | 1059.5560 | 2.51 | 0    | 24    | 0.084  | 1    | R.TLIDQESVR.D |

---

9. [gi|125982242](#) Mass: 50218 Score: 24 Queries matched: 1  
GA22115-PA [Drosophila pseudoobscura]

Check to include this hit in error tolerant search or archive report

| Query                                                    | Observed | Mr(expt) | Mr(calc) | ppm  | Miss | Score | Expect | Rank | Peptide    |
|----------------------------------------------------------|----------|----------|----------|------|------|-------|--------|------|------------|
| <input checked="" type="checkbox"/> <a href="#">2501</a> | 401.7252 | 801.4359 | 801.4344 | 1.77 | 1    | 24    | 0.16   | 1    | R.EREQIK.R |

10. [gi|19922798](#) Mass: 50665 Score: 23 Queries matched: 1  
CG3085-PA [Drosophila melanogaster]  
 Check to include this hit in error tolerant search or archive report

| Query                                                    | Observed | Mr(expt) | Mr(calc) | ppm  | Miss | Score | Expect | Rank | Peptide    |
|----------------------------------------------------------|----------|----------|----------|------|------|-------|--------|------|------------|
| <input checked="" type="checkbox"/> <a href="#">2380</a> | 731.4070 | 730.3998 | 730.3973 | 3.34 | 0    | 23    | 0.22   | 1    | R.ISELNR.W |

## Proteins matching the same set of peptides:

- [gi|27374258](#) Mass: 50627 Score: 23 Queries matched: 1  
CG3085-PA [Drosophila erecta]  
[gi|125807457](#) Mass: 50658 Score: 23 Queries matched: 1  
GA15915-PA [Drosophila pseudoobscura]

11. [gi|24668309](#) Mass: 96012 Score: 23 Queries matched: 1 emPAI: 0.03  
CG11248-PA, isoform A [Drosophila melanogaster]  
 Check to include this hit in error tolerant search or archive report

| Query                                                    | Observed | Mr(expt) | Mr(calc) | ppm  | Miss | Score | Expect | Rank | Peptide     |
|----------------------------------------------------------|----------|----------|----------|------|------|-------|--------|------|-------------|
| <input checked="" type="checkbox"/> <a href="#">2584</a> | 846.4335 | 845.4262 | 845.4243 | 2.29 | 0    | 23    | 0.089  | 1    | K.ALAEESR.I |

## Peptide matches not assigned to protein hits: (no details means no match)

| Query                                                    | Observed | Mr(expt) | Mr(calc) | ppm   | Miss | Score | Expect | Rank | Peptide                 |
|----------------------------------------------------------|----------|----------|----------|-------|------|-------|--------|------|-------------------------|
| <input checked="" type="checkbox"/> <a href="#">1656</a> | 559.3458 | 558.3385 | 558.3377 | 1.42  | 0    | 22    | 0.17   | 1    | IAEVK                   |
| <input checked="" type="checkbox"/> <a href="#">2741</a> | 466.7448 | 931.4751 | 931.4770 | -1.99 | 2    | 21    | 0.15   | 1    | ACSPRRSR                |
| <input checked="" type="checkbox"/> <a href="#">2738</a> | 466.7435 | 931.4724 | 931.4770 | -4.94 | 2    | 21    | 0.14   | 1    | ACSPRRSR                |
| <input checked="" type="checkbox"/> <a href="#">1990</a> | 625.3202 | 624.3130 | 624.3119 | 1.76  | 0    | 21    | 0.099  | 1    | SYLDK                   |
| <input checked="" type="checkbox"/> <a href="#">2490</a> | 794.3867 | 793.3794 | 793.3817 | -2.88 | 1    | 20    | 0.092  | 1    | SSSEKEK                 |
| <input checked="" type="checkbox"/> <a href="#">2511</a> | 405.2246 | 808.4346 | 808.4330 | 1.93  | 0    | 20    | 0.068  | 1    | IASDYLK                 |
| <input checked="" type="checkbox"/> <a href="#">2509</a> | 807.4024 | 806.3951 | 806.3956 | -0.63 | 0    | 20    | 0.15   | 1    | MSSPTLR + Oxidation (M) |
| <input checked="" type="checkbox"/> <a href="#">2557</a> | 831.4952 | 830.4879 | 830.4862 | 2.10  | 0    | 20    | 0.25   | 1    | SLVVANTK                |
| <input checked="" type="checkbox"/> <a href="#">1657</a> | 559.3466 | 558.3393 | 558.3377 | 2.96  | 0    | 20    | 0.3    | 1    | IAEVK                   |
| <input checked="" type="checkbox"/> <a href="#">2789</a> | 487.2707 | 972.5268 | 972.5240 | 2.86  | 0    | 20    | 0.17   | 1    | LLTDELNR                |
| <input checked="" type="checkbox"/> <a href="#">2011</a> | 628.3781 | 627.3708 | 627.3704 | 0.68  | 0    | 19    | 0.15   | 1    | GSVLPR                  |

 **Mascot Search Results**

User : Julie Kadrmas; gel band: #92  
Email : 110224FT\_JulieKadrmas\_92  
Search title : NCBI Drosophila DB trypsin specific search: Oxidation (MHW)  
MS data file : C:\Documents and Settings\cnelson\Desktop\Merge Files\_2011\February\_2011\merge\_110224FT\_JulieKad  
Database : NCBIInr (5335292 sequences; 1845185051 residues)  
Taxonomy : Drosophila (fruit flies) (50248 sequences)  
Timestamp : 25 Feb 2011 at 18:51:51 GMT  
Protein hits : [gi|17737405](#) Proteasome 35kD subunit CG4904-PA [Drosophila melanogaster]  
[gi|62862344](#) CG10837-PB.3 [Drosophila melanogaster]  
[gi|17136226](#) Ecdysone-inducible gene L3 CG10160-PA [Drosophila melanogaster]  
[gi|82466274](#) kl-2 protein [Drosophila bipectinata]  
[gi|3426089](#) polyprotein [Drosophila melanogaster]  
[gi|24653473](#) CG30484-PA [Drosophila melanogaster]  
[gi|8630](#) unnamed protein product [Drosophila melanogaster]  
[gi|125985389](#) GA19998-PA [Drosophila pseudoobscura]  
[gi|21358649](#) CG3508-PA, isoform A [Drosophila melanogaster]  
[gi|16768410](#) GM04011p [Drosophila melanogaster]

**Probability Based Mowse Score**

Ions score is  $-10 \cdot \log(P)$ , where P is the probability that the observed match is a random event.  
Individual ions scores  $> 24$  indicate identity or extensive homology ( $p < 0.05$ ).  
Protein scores are derived from ions scores as a non-probabilistic basis for ranking protein hits.

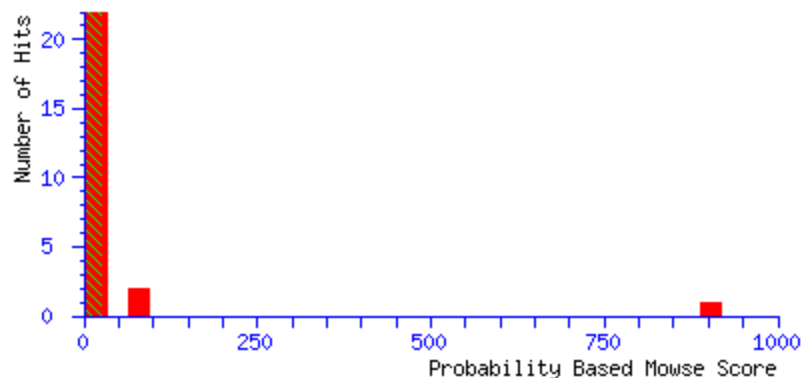

## Peptide Summary Report

Format As  [Help](#)

Significance threshold p<  Max. number of hits

Standard scoring  MudPIT scoring  Ions score or expect cut-off  Show sub-sets

Show pop-ups  Suppress pop-ups  Sort unassigned  Require bold red

Error tolerant

1. [gi|17737405](#) **Mass:** 31040 **Score:** 905 **Queries matched:** 33 **emPAI:** 10.46  
 Proteasome 35kD subunit CG4904-PA [Drosophila melanogaster]

Check to include this hit in error tolerant search or archive report

| Query                                                    | Observed | Mr (expt) | Mr (calc) | ppm  | Miss | Score | Expect | Rank | Peptide       |
|----------------------------------------------------------|----------|-----------|-----------|------|------|-------|--------|------|---------------|
| <input checked="" type="checkbox"/> <a href="#">1356</a> | 638.4000 | 637.3927  | 637.3911  | 2.44 | 0    | 29    | 0.0077 | 1    | K.HVAIAK.E    |
| <input checked="" type="checkbox"/> <a href="#">1376</a> | 645.3580 | 644.3507  | 644.3493  | 2.13 | 0    | 24    | 0.14   | 1    | K.DEIIR.H     |
| <input checked="" type="checkbox"/> <a href="#">1407</a> | 653.3519 | 652.3447  | 652.3432  | 2.29 | 0    | 24    | 0.019  | 1    | R.TYLEK.N     |
| <input checked="" type="checkbox"/> <a href="#">1762</a> | 436.7645 | 871.5145  | 871.5127  | 2.04 | 0    | 41    | 0.0015 | 1    | R.LITNLGNK.M  |
| <input checked="" type="checkbox"/> <a href="#">1763</a> | 872.5224 | 871.5151  | 871.5127  | 2.79 | 0    | (37)  | 0.004  | 1    | R.LITNLGNK.M  |
| <input checked="" type="checkbox"/> <a href="#">1764</a> | 872.5232 | 871.5160  | 871.5127  | 3.76 | 0    | (33)  | 0.0096 | 1    | R.LITNLGNK.M  |
| <a href="#">1967</a>                                     | 561.8131 | 1121.6116 | 1121.6080 | 3.18 | 1    | 30    | 0.0066 | 1    | R.TYLEKNLNK.F |



|                                     |                      |          |           |           |      |   |    |        |   |                    |
|-------------------------------------|----------------------|----------|-----------|-----------|------|---|----|--------|---|--------------------|
| <input checked="" type="checkbox"/> | <a href="#">1830</a> | 458.7409 | 915.4672  | 915.4661  | 1.17 | 0 | 26 | 0.033  | 1 | R.ELEIEQR.L        |
| <input checked="" type="checkbox"/> | <a href="#">2111</a> | 851.4325 | 1700.8505 | 1700.8441 | 3.75 | 1 | 36 | 0.0046 | 1 | R.IRIELSNENDQQSR.Q |

## Proteins matching the same set of peptides:

|                                        |             |           |                    |
|----------------------------------------|-------------|-----------|--------------------|
| <a href="#">gi 62862346</a>            | Mass: 44097 | Score: 62 | Queries matched: 2 |
| CG10837-PE.3 [Drosophila melanogaster] |             |           |                    |
| <a href="#">gi 62862348</a>            | Mass: 44197 | Score: 62 | Queries matched: 2 |
| CG10837-PA.3 [Drosophila melanogaster] |             |           |                    |

3. [gi|17136226](#) Mass: 35515 Score: 53 Queries matched: 1 emPAI: 0.09  
Ecdysone-inducible gene L3 CG10160-PA [Drosophila melanogaster]

Check to include this hit in error tolerant search or archive report

| Query                               | Observed             | Mr(expt) | Mr(calc)  | ppm       | Miss | Score | Expect | Rank     | Peptide |                   |
|-------------------------------------|----------------------|----------|-----------|-----------|------|-------|--------|----------|---------|-------------------|
| <input checked="" type="checkbox"/> | <a href="#">2091</a> | 763.9261 | 1525.8376 | 1525.8352 | 1.62 | 0     | 53     | 5.8e-005 | 1       | K.QILTPTEVEQLQK.S |

## Proteins matching the same set of peptides:

|                                    |             |           |                    |
|------------------------------------|-------------|-----------|--------------------|
| <a href="#">gi 78214230</a>        | Mass: 35524 | Score: 53 | Queries matched: 1 |
| RE54418p [Drosophila melanogaster] |             |           |                    |

4. [gi|82466274](#) Mass: 19078 Score: 35 Queries matched: 1 emPAI: 0.18  
kl-2 protein [Drosophila bipectinata]

Check to include this hit in error tolerant search or archive report

| Query                               | Observed             | Mr(expt) | Mr(calc)  | ppm       | Miss | Score | Expect | Rank   | Peptide |                |
|-------------------------------------|----------------------|----------|-----------|-----------|------|-------|--------|--------|---------|----------------|
| <input checked="" type="checkbox"/> | <a href="#">1907</a> | 515.3014 | 1028.5882 | 1028.5866 | 1.54 | 0     | 35     | 0.0047 | 1       | K.DELVLTIIAR.N |

## Proteins matching the same set of peptides:

|                                                   |             |           |                    |
|---------------------------------------------------|-------------|-----------|--------------------|
| <a href="#">gi 82466286</a>                       | Mass: 19064 | Score: 35 | Queries matched: 1 |
| kl-2 protein [Drosophila pseudoananassae nigrens] |             |           |                    |

5. [gi|3426089](#) Mass: 177601 Score: 31 Queries matched: 3 emPAI: 0.02  
polyprotein [Drosophila melanogaster]

Check to include this hit in error tolerant search or archive report

|                                     | Query                | Observed | Mr(expt) | Mr(calc) | ppm  | Miss | Score | Expect | Rank | Peptide    |
|-------------------------------------|----------------------|----------|----------|----------|------|------|-------|--------|------|------------|
| <input checked="" type="checkbox"/> | <a href="#">1453</a> | 672.4046 | 671.3974 | 671.3966 | 1.09 | 0    | 31    | 0.01   | 1    | K.TVSLPR.L |
| <input checked="" type="checkbox"/> | <a href="#">1456</a> | 672.4051 | 671.3978 | 671.3966 | 1.78 | 0    | (29)  | 0.019  | 1    | K.TVSLPR.L |
| <input checked="" type="checkbox"/> | <a href="#">1457</a> | 672.4051 | 671.3978 | 671.3966 | 1.82 | 0    | (31)  | 0.011  | 1    | K.TVSLPR.L |

**Proteins matching the same set of peptides:**

[gi|21214752](#) Mass: 206214 Score: 31 Queries matched: 3  
gag-pol polyprotein precursor; hypothetical protein [Drosophila melanogaster]

[gi|25009978](#) Mass: 83774 Score: 31 Queries matched: 3  
GH06606p [Drosophila melanogaster]

---

6. [gi|24653473](#) Mass: 101560 Score: 30 Queries matched: 1 emPAI: 0.03  
CG30484-PA [Drosophila melanogaster]

Check to include this hit in error tolerant search or archive report

|                                     | Query                | Observed | Mr(expt) | Mr(calc) | ppm   | Miss | Score | Expect | Rank | Peptide                      |
|-------------------------------------|----------------------|----------|----------|----------|-------|------|-------|--------|------|------------------------------|
| <input checked="" type="checkbox"/> | <a href="#">1812</a> | 453.7388 | 905.4631 | 905.4640 | -1.06 | 1    | 30    | 0.019  | 1    | K.MLEGKANK.I + Oxidation (M) |

---

7. [gi|8630](#) Mass: 42958 Score: 27 Queries matched: 1 emPAI: 0.08  
unnamed protein product [Drosophila melanogaster]

Check to include this hit in error tolerant search or archive report

|                                     | Query                | Observed | Mr(expt) | Mr(calc) | ppm  | Miss | Score | Expect | Rank | Peptide    |
|-------------------------------------|----------------------|----------|----------|----------|------|------|-------|--------|------|------------|
| <input checked="" type="checkbox"/> | <a href="#">1522</a> | 697.3347 | 696.3274 | 696.3265 | 1.41 | 0    | 27    | 0.016  | 1    | -.MAANYK.S |

**Proteins matching the same set of peptides:**

[gi|17136490](#) Mass: 42928 Score: 27 Queries matched: 1  
snail CG3956-PA [Drosophila melanogaster]

[gi|125984502](#) Mass: 44640 Score: 27 Queries matched: 1  
GA17803-PA [Drosophila pseudoobscura]

---

8. [gi|125985389](#) Mass: 238718 Score: 26 Queries matched: 1 emPAI: 0.01  
GA19998-PA [Drosophila pseudoobscura]

Check to include this hit in error tolerant search or archive report

| Query                                                    | Observed | Mr(expt)  | Mr(calc)  | ppm  | Miss | Score | Expect | Rank | Peptide      |
|----------------------------------------------------------|----------|-----------|-----------|------|------|-------|--------|------|--------------|
| <input checked="" type="checkbox"/> <a href="#">1895</a> | 501.7645 | 1001.5144 | 1001.5141 | 0.24 | 1    | 28    | 0.046  | 1    | K.AEEEEQLK.A |

9. [gi|21358649](#) Mass: 38035 Score: 25 Queries matched: 2 emPAI: 0.09  
CG3508-PA, isoform A [Drosophila melanogaster]

Check to include this hit in error tolerant search or archive report

| Query                                                    | Observed | Mr(expt) | Mr(calc) | ppm  | Miss | Score | Expect | Rank | Peptide                    |
|----------------------------------------------------------|----------|----------|----------|------|------|-------|--------|------|----------------------------|
| <input checked="" type="checkbox"/> <a href="#">1446</a> | 664.3349 | 663.3276 | 663.3261 | 2.24 | 0    | 25    | 0.046  | 1    | -.MAEAVK.N + Oxidation (M) |
| <input checked="" type="checkbox"/> <a href="#">1447</a> | 664.3359 | 663.3286 | 663.3261 | 3.71 | 0    | (21)  | 0.11   | 1    | -.MAEAVK.N + Oxidation (M) |

Proteins matching the same set of peptides:

[gi|24646884](#) Mass: 39187 Score: 25 Queries matched: 2  
CG3508-PB, isoform B [Drosophila melanogaster]

[gi|25012395](#) Mass: 39158 Score: 25 Queries matched: 2  
RE11603p [Drosophila melanogaster]

[gi|125774419](#) Mass: 34857 Score: 25 Queries matched: 2  
GA17490-PA [Drosophila pseudoobscura]

10. [gi|16768410](#) Score: 24 Queries matched: 1  
GM04011p [Drosophila melanogaster]

Check to include this hit in error tolerant search or archive report

| Query                                                    | Observed | Mr(expt) | Mr(calc) | ppm  | Miss | Score | Expect | Rank | Peptide   |
|----------------------------------------------------------|----------|----------|----------|------|------|-------|--------|------|-----------|
| <input checked="" type="checkbox"/> <a href="#">1031</a> | 545.3055 | 544.2982 | 544.2969 | 2.41 | 0    | 24    | 0.28   | 1    | R.NLGNK.F |

Proteins matching the same set of peptides:

[gi|24582135](#) Score: 24 Queries matched: 1

[gi|45580808](#) Score: 24 Queries matched: 1



Peptide matches not assigned to protein hits: (no details means no match)

| <input checked="" type="checkbox"/> | Query                | Observed | Mr(expt)  | Mr(calc)  | ppm   | Miss | Score | Expect | Rank | Peptide                                |
|-------------------------------------|----------------------|----------|-----------|-----------|-------|------|-------|--------|------|----------------------------------------|
| <input checked="" type="checkbox"/> | <a href="#">1987</a> | 588.3181 | 1174.6216 | 1174.6167 | 4.22  | 2    | 24    | 0.06   | 1    | RASSQSQQKR                             |
| <input checked="" type="checkbox"/> | <a href="#">1836</a> | 466.7445 | 931.4745  | 931.4770  | -2.65 | 2    | 23    | 0.076  | 1    | ACSPRRSR                               |
| <input checked="" type="checkbox"/> | <a href="#">1386</a> | 646.3533 | 645.3460  | 645.3446  | 2.25  | 0    | 23    | 0.17   | 1    | NTLNGK                                 |
| <input checked="" type="checkbox"/> | <a href="#">1767</a> | 437.7542 | 873.4939  | 873.4920  | 2.26  | 1    | 22    | 0.11   | 1    | DGKINLSK                               |
| <input checked="" type="checkbox"/> | <a href="#">1919</a> | 523.2869 | 1044.5592 | 1044.5564 | 2.72  | 0    | 22    | 0.12   | 1    | LSSLDQNIR                              |
| <input checked="" type="checkbox"/> | <a href="#">1859</a> | 947.5165 | 946.5093  | 946.5056  | 3.82  | 2    | 22    | 0.09   | 1    | SSRAQSRR                               |
| <input checked="" type="checkbox"/> | <a href="#">1766</a> | 874.4898 | 873.4826  | 873.4807  | 2.10  | 0    | 21    | 0.12   | 1    | SLVEAEVK                               |
| <input checked="" type="checkbox"/> | <a href="#">1846</a> | 468.2707 | 934.5268  | 934.5236  | 3.47  | 1    | 21    | 0.11   | 1    | AAYDKVLR                               |
| <input checked="" type="checkbox"/> | <a href="#">1724</a> | 423.2281 | 844.4417  | 844.4443  | -3.09 | 0    | 20    | 0.15   | 1    | SPALWGSK                               |
| <input checked="" type="checkbox"/> | <a href="#">1725</a> | 423.2283 | 844.4420  | 844.4443  | -2.72 | 0    | 20    | 0.16   | 1    | SPALWGSK                               |
| <input checked="" type="checkbox"/> | <a href="#">1860</a> | 474.2621 | 946.5097  | 946.5058  | 4.06  | 0    | 20    | 0.14   | 1    | TWIMIQR                                |
| <input checked="" type="checkbox"/> | <a href="#">888</a>  | 515.3307 | 514.3234  | 514.3227  | 1.40  | 0    | 20    | 0.49   | 1    | LGAVR                                  |
| <input checked="" type="checkbox"/> | <a href="#">1525</a> | 699.4147 | 698.4075  | 698.4075  | -0.09 | 0    | 19    | 0.19   | 1    | QVSLPR                                 |
| <input checked="" type="checkbox"/> | <a href="#">1755</a> | 432.7511 | 863.4877  | 863.4899  | -2.49 | 1    | 19    | 0.16   | 1    | SMLTKIR + Oxidation (M)                |
| <input checked="" type="checkbox"/> | <a href="#">1778</a> | 439.7332 | 877.4519  | 877.4480  | 4.46  | 0    | 19    | 0.19   | 1    | LMQWLR + Oxidation (HW); Oxidation (M) |
| <input checked="" type="checkbox"/> | <a href="#">1408</a> | 653.3521 | 652.3448  | 652.3432  | 2.50  | 0    | 19    | 0.059  | 1    | TYLEK                                  |
| <input checked="" type="checkbox"/> | <a href="#">1715</a> | 421.2614 | 840.5083  | 840.5069  | 1.71  | 0    | 18    | 0.072  | 1    | IGGPGSLIK                              |
| <input checked="" type="checkbox"/> | <a href="#">1671</a> | 791.4434 | 790.4361  | 790.4371  | -1.19 | 1    | 18    | 0.47   | 1    | QMLKQK + Oxidation (M)                 |
| <input checked="" type="checkbox"/> | <a href="#">1698</a> | 827.3995 | 826.3923  | 826.3895  | 3.39  | 0    | 18    | 0.16   | 1    | MEAAYVK + Oxidation (M)                |
| <input checked="" type="checkbox"/> | <a href="#">1026</a> | 543.3514 | 542.3442  | 542.3428  | 2.54  | 0    | 18    | 0.11   | 1    | SPLVK                                  |
| <input checked="" type="checkbox"/> | <a href="#">1918</a> | 523.2862 | 1044.5579 | 1044.5564 | 1.48  | 0    | 18    | 0.32   | 1    | LSSLDQNIR                              |
| <input checked="" type="checkbox"/> | <a href="#">886</a>  | 515.3307 | 514.3234  | 514.3227  | 1.34  | 0    | 18    | 0.81   | 1    | LGAVR                                  |
| <input checked="" type="checkbox"/> | <a href="#">889</a>  | 515.3308 | 514.3235  | 514.3227  | 1.52  | 0    | 17    | 0.83   | 1    | LGAVR                                  |
| <input checked="" type="checkbox"/> | <a href="#">891</a>  | 515.3309 | 514.3236  | 514.3227  | 1.73  | 0    | 17    | 0.83   | 1    | LGAVR                                  |
| <input checked="" type="checkbox"/> | <a href="#">887</a>  | 515.3307 | 514.3234  | 514.3227  | 1.40  | 0    | 17    | 0.83   | 1    | LGAVR                                  |
| <input checked="" type="checkbox"/> | <a href="#">1455</a> | 672.4049 | 671.3976  | 671.3966  | 1.51  | 0    | 17    | 0.26   | 1    | TVSLPR                                 |
| <input checked="" type="checkbox"/> | <a href="#">890</a>  | 515.3308 | 514.3235  | 514.3227  | 1.56  | 0    | 17    | 0.84   | 1    | LGAVR                                  |
| <input checked="" type="checkbox"/> | <a href="#">1729</a> | 423.7202 | 845.4259  | 845.4243  | 1.99  | 0    | 17    | 0.36   | 1    | ALAEAESR                               |
| <input checked="" type="checkbox"/> | <a href="#">1428</a> | 663.3853 | 662.3780  | 662.3752  | 4.35  | 0    | 17    | 0.42   | 1    | GQAFLK                                 |
| <input checked="" type="checkbox"/> | <a href="#">1427</a> | 663.3851 | 662.3778  | 662.3752  | 3.99  | 0    | 17    | 0.44   | 1    | GQAFLK                                 |

# **MASCOT** Mascot Search Results

User : Julie Kadrmas; gel band: #111  
Email : 110224FT\_JulieKadrmas\_111  
Search title : NCBI Drosophila DB trypsin specific search: Oxidation (MHW)  
MS data file : C:\Documents and Settings\cnelson\Desktop\Merge Files\_2011\February\_2011\merge\_110224FT\_JulieKad  
Database : NCBI Inr (5335292 sequences; 1845185051 residues)  
Taxonomy : Drosophila (fruit flies) (50248 sequences)  
Timestamp : 25 Feb 2011 at 18:54:28 GMT  
Protein hits : [gi|21428580](#) LD43891p [Drosophila melanogaster]  
[gi|24644197](#) CG11999-PA [Drosophila melanogaster]  
[gi|2582508](#) 20S proteasome alpha7 subunit [Drosophila melanogaster]  
[gi|24584030](#) CG16972-PA [Drosophila melanogaster]  
[gi|3426089](#) polyprotein [Drosophila melanogaster]  
[gi|17862878](#) SD01389p [Drosophila melanogaster]  
[gi|8380](#) unnamed protein product [Drosophila melanogaster]  
[gi|24644950](#) CG2767-PA [Drosophila melanogaster]

## Probability Based Mowse Score

Ions score is  $-10 \cdot \log(P)$ , where P is the probability that the observed match is a random event. Individual ions scores  $> 24$  indicate identity or extensive homology ( $p < 0.05$ ). Protein scores are derived from ions scores as a non-probabilistic basis for ranking protein hits.

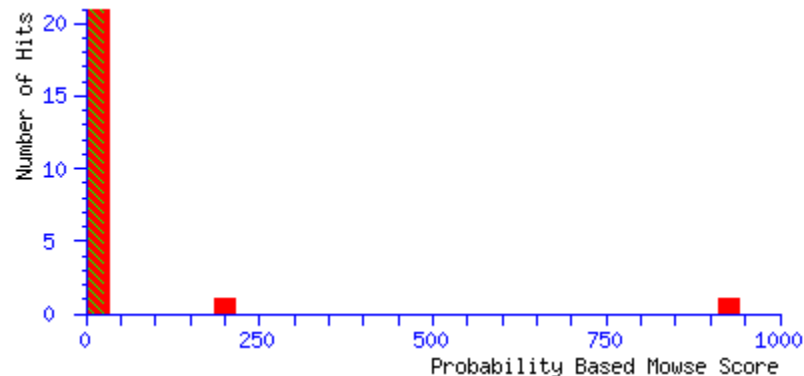

## Peptide Summary Report

Format As Peptide Summary [Help](#)

Significance threshold p<  Max. number of hits

Standard scoring  MudPIT scoring  Ions score or expect cut-off  Show sub-sets

Show pop-ups  Suppress pop-ups  Sort unassigned  Require bold red

Error tolerant

1. [gi|21428580](#) **Mass:** 30698 **Score:** 925 **Queries matched:** 34 **emPAI:** 12.03  
LD43891p [Drosophila melanogaster]

Check to include this hit in error tolerant search or archive report

| Query                                                    | Observed | Mr (expt) | Mr (calc) | ppm  | Miss | Score | Expect   | Rank | Peptide        |
|----------------------------------------------------------|----------|-----------|-----------|------|------|-------|----------|------|----------------|
| <input checked="" type="checkbox"/> <a href="#">1534</a> | 673.3901 | 672.3828  | 672.3806  | 3.23 | 0    | 25    | 0.056    | 1    | K.EVGQLK.N     |
| <input checked="" type="checkbox"/> <a href="#">1604</a> | 702.3796 | 701.3724  | 701.3708  | 2.25 | 0    | (24)  | 0.1      | 1    | K.VLDEAR.E     |
| <input checked="" type="checkbox"/> <a href="#">1606</a> | 702.3803 | 701.3730  | 701.3708  | 3.12 | 0    | 32    | 0.015    | 1    | K.VLDEAR.E     |
| <input checked="" type="checkbox"/> <a href="#">1733</a> | 787.4331 | 786.4258  | 786.4236  | 2.88 | 0    | 26    | 0.04     | 1    | R.EVGDLVR.L    |
| <input checked="" type="checkbox"/> <a href="#">1763</a> | 406.7358 | 811.4570  | 811.4552  | 2.24 | 0    | 33    | 0.0046   | 1    | R.LTLSHNK.I    |
| <input checked="" type="checkbox"/> <a href="#">1794</a> | 415.7409 | 829.4673  | 829.4657  | 1.87 | 1    | (37)  | 0.0044   | 1    | K.KVLDEAR.E    |
| <input checked="" type="checkbox"/> <a href="#">1795</a> | 415.7412 | 829.4679  | 829.4657  | 2.64 | 1    | 42    | 0.0013   | 1    | K.KVLDEAR.E    |
| <input checked="" type="checkbox"/> <a href="#">1886</a> | 463.7932 | 925.5719  | 925.5709  | 1.08 | 0    | 46    | 0.00013  | 1    | K.NLQILGLR.D   |
| <input checked="" type="checkbox"/> <a href="#">1887</a> | 463.7938 | 925.5731  | 925.5709  | 2.40 | 0    | (36)  | 0.0011   | 1    | K.NLQILGLR.D   |
| <input checked="" type="checkbox"/> <a href="#">1888</a> | 464.7831 | 927.5516  | 927.5501  | 1.56 | 0    | (39)  | 0.0015   | 1    | R.ILNVSINR.L   |
| <input checked="" type="checkbox"/> <a href="#">1889</a> | 464.7831 | 927.5516  | 927.5501  | 1.59 | 0    | (59)  | 1.6e-005 | 1    | R.ILNVSINR.L   |
| <input checked="" type="checkbox"/> <a href="#">1891</a> | 464.7832 | 927.5519  | 927.5501  | 1.88 | 0    | 60    | 1.4e-005 | 1    | R.ILNVSINR.L   |
| <input checked="" type="checkbox"/> <a href="#">1892</a> | 464.7837 | 927.5529  | 927.5501  | 2.97 | 0    | (59)  | 1.5e-005 | 1    | R.ILNVSINR.L   |
| <input checked="" type="checkbox"/> <a href="#">1944</a> | 497.2732 | 992.5319  | 992.5291  | 2.83 | 1    | 47    | 0.00029  | 1    | R.SGPPPPKADK.S |
| <input checked="" type="checkbox"/> <a href="#">1952</a> | 512.2713 | 1022.5281 | 1022.5257 | 2.35 | 0    | 27    | 0.04     | 1    | R.ELHIQNNR.L   |
| <input checked="" type="checkbox"/> <a href="#">1969</a> | 542.7868 | 1083.5591 | 1083.5560 | 2.86 | 0    | 63    | 4.8e-006 | 1    | R.DNDLLELPR.E  |
| <input checked="" type="checkbox"/> <a href="#">1993</a> | 599.3775 | 1196.7405 | 1196.7353 | 4.30 | 1    | 49    | 4.9e-005 | 1    | K.LRILNVSINR.L |
| <input checked="" type="checkbox"/> <a href="#">2009</a> | 431.5785 | 1291.7137 | 1291.7109 | 2.21 | 1    | 37    | 0.002    | 1    | R.LRELHIQNNR.L |

|                                     |                      |           |           |           |       |   |      |          |   |                                     |
|-------------------------------------|----------------------|-----------|-----------|-----------|-------|---|------|----------|---|-------------------------------------|
| <input checked="" type="checkbox"/> | <a href="#">2010</a> | 646.8644  | 1291.7142 | 1291.7109 | 2.58  | 1 | (33) | 0.0045   | 1 | R.LRELHIQNNR.L                      |
| <input checked="" type="checkbox"/> | <a href="#">2014</a> | 650.8500  | 1299.6855 | 1299.6823 | 2.51  | 1 | 39   | 0.0022   | 1 | K.TETYKIIYNR.H                      |
| <input checked="" type="checkbox"/> | <a href="#">2022</a> | 461.2256  | 1380.6548 | 1380.6521 | 1.98  | 0 | (33) | 0.0047   | 1 | R.ETHNPELDLADK.G                    |
| <input checked="" type="checkbox"/> | <a href="#">2023</a> | 691.3359  | 1380.6573 | 1380.6521 | 3.74  | 0 | 69   | 1e-006   | 1 | R.ETHNPELDLADK.G                    |
| <input checked="" type="checkbox"/> | <a href="#">2037</a> | 545.6759  | 1634.0059 | 1633.9991 | 4.14  | 1 | 47   | 2.2e-005 | 1 | R.ILNVSINRLINLPR.G                  |
| <input checked="" type="checkbox"/> | <a href="#">2038</a> | 829.4126  | 1656.8107 | 1656.8035 | 4.32  | 0 | 63   | 7.4e-006 | 1 | R.ALYLGDNDFEYIPK.E                  |
| <input checked="" type="checkbox"/> | <a href="#">2060</a> | 618.3314  | 1851.9723 | 1851.9690 | 1.79  | 1 | 36   | 0.0036   | 1 | R.DNDLLELPREVGDLVR.L                |
| <input checked="" type="checkbox"/> | <a href="#">2061</a> | 946.0439  | 1890.0733 | 1890.0826 | -4.92 | 0 | (38) | 0.00053  | 1 | R.LQVLPPEIAQLDLLSNK.S               |
| <input checked="" type="checkbox"/> | <a href="#">2062</a> | 631.0356  | 1890.0850 | 1890.0826 | 1.29  | 0 | (53) | 1.8e-005 | 1 | R.LQVLPPEIAQLDLLSNK.S               |
| <input checked="" type="checkbox"/> | <a href="#">2063</a> | 946.0505  | 1890.0865 | 1890.0826 | 2.05  | 0 | 54   | 1.5e-005 | 1 | R.LQVLPPEIAQLDLLSNK.S               |
| <input checked="" type="checkbox"/> | <a href="#">2064</a> | 946.0511  | 1890.0876 | 1890.0826 | 2.64  | 0 | (47) | 6.5e-005 | 1 | R.LQVLPPEIAQLDLLSNK.S               |
| <input checked="" type="checkbox"/> | <a href="#">2072</a> | 996.5666  | 1991.1186 | 1991.1163 | 1.12  | 1 | 49   | 7.8e-005 | 1 | K.NLQILGLRDNDLLELPR.E               |
| <input checked="" type="checkbox"/> | <a href="#">2073</a> | 664.7149  | 1991.1228 | 1991.1163 | 3.24  | 1 | (41) | 0.00035  | 1 | K.NLQILGLRDNDLLELPR.E               |
| <input checked="" type="checkbox"/> | <a href="#">2080</a> | 689.0135  | 2064.0186 | 2064.0123 | 3.05  | 1 | 34   | 0.0078   | 1 | K.VLDEARETHNPELDLADK.G              |
| <input checked="" type="checkbox"/> | <a href="#">2083</a> | 1064.5235 | 2127.0325 | 2127.0306 | 0.88  | 0 | (45) | 0.00047  | 1 | K.GLSSFEELPGLFNMSNITR.L + Oxidation |
| <input checked="" type="checkbox"/> | <a href="#">2084</a> | 710.0181  | 2127.0326 | 2127.0306 | 0.90  | 0 | 49   | 0.00022  | 1 | K.GLSSFEELPGLFNMSNITR.L + Oxidation |

Proteins matching the same set of peptides:

[gi|45550188](#) Mass: 31830 Score: 925 Queries matched: 34  
 Ras suppressor-1 CG9031-PA [Drosophila melanogaster]

2. [gi|24644197](#) Mass: 23619 Score: 188 Queries matched: 4 emPAI: 0.70  
 CG11999-PA [Drosophila melanogaster]

Check to include this hit in error tolerant search or archive report

| Query                               | Observed             | Mr(expt) | Mr(calc)  | ppm       | Miss | Score | Expect | Rank     | Peptide |                                                                 |
|-------------------------------------|----------------------|----------|-----------|-----------|------|-------|--------|----------|---------|-----------------------------------------------------------------|
| <input checked="" type="checkbox"/> | <a href="#">1975</a> | 549.7837 | 1097.5529 | 1097.5505 | 2.15 | 0     | 45     | 0.00034  | 1       | K.LLNSDYAFR.L                                                   |
| <input checked="" type="checkbox"/> | <a href="#">2017</a> | 681.3785 | 1360.7424 | 1360.7391 | 2.44 | 0     | 57     | 2.5e-005 | 1       | R.WTTAEGLFIVPK.E                                                |
| <input checked="" type="checkbox"/> | <a href="#">2020</a> | 688.2942 | 1374.5738 | 1374.5688 | 3.63 | 0     | 27     | 0.0047   | 1       | K.SSTHDEYAHSEL.-                                                |
| <input checked="" type="checkbox"/> | <a href="#">2049</a> | 580.2861 | 1737.8364 | 1737.8291 | 4.22 | 1     | 61     | 1.3e-005 | 1       | R.LRHIDTGM <sup>Y</sup> LGM <sup>S</sup> GR.S + 2 Oxidation (M) |

3. [gi|2582508](#) Mass: 27444 Score: 43 Queries matched: 1 emPAI: 0.12  
 20S proteasome alpha7 subunit [Drosophila melanogaster]

Check to include this hit in error tolerant search or archive report

| Query                                                    | Observed | Mr(expt)  | Mr(calc)  | ppm  | Miss | Score | Expect  | Rank | Peptide       |
|----------------------------------------------------------|----------|-----------|-----------|------|------|-------|---------|------|---------------|
| <input checked="" type="checkbox"/> <a href="#">1966</a> | 535.7814 | 1069.5482 | 1069.5444 | 3.54 | 0    | 43    | 0.00056 | 1    | R.VFQIDYASK.V |

Proteins matching the same set of peptides:

[gi|24652204](#) Mass: 27658 Score: 43 Queries matched: 1  
 Proteasome alpha7 subunit CG1519-PA, isoform A [Drosophila melanogaster]  
[gi|28573936](#) Mass: 25656 Score: 43 Queries matched: 1  
 Proteasome alpha7 subunit CG1519-PB, isoform B [Drosophila melanogaster]  
[gi|125811303](#) Mass: 53546 Score: 43 Queries matched: 1  
 GA13558-PA [Drosophila pseudoobscura]

4. [gi|24584030](#) Score: 38 Queries matched: 1  
 CG16972-PA [Drosophila melanogaster]

Check to include this hit in error tolerant search or archive report

| Query                                                    | Observed | Mr(expt) | Mr(calc) | ppm  | Miss | Score | Expect | Rank | Peptide   |
|----------------------------------------------------------|----------|----------|----------|------|------|-------|--------|------|-----------|
| <input checked="" type="checkbox"/> <a href="#">1138</a> | 558.3253 | 557.3180 | 557.3173 | 1.35 | 0    | 38    | 0.0025 | 1    | K.KPADK.S |

5. [gi|3426089](#) Mass: 177601 Score: 29 Queries matched: 5 emPAI: 0.02  
 polyprotein [Drosophila melanogaster]

Check to include this hit in error tolerant search or archive report

| Query                                                    | Observed | Mr(expt) | Mr(calc) | ppm  | Miss | Score | Expect | Rank | Peptide    |
|----------------------------------------------------------|----------|----------|----------|------|------|-------|--------|------|------------|
| <input checked="" type="checkbox"/> <a href="#">1527</a> | 672.4048 | 671.3975 | 671.3966 | 1.27 | 0    | 29    | 0.019  | 1    | K.TVSLPR.L |
| <input checked="" type="checkbox"/> <a href="#">1528</a> | 672.4049 | 671.3976 | 671.3966 | 1.46 | 0    | (24)  | 0.051  | 1    | K.TVSLPR.L |
| <input checked="" type="checkbox"/> <a href="#">1529</a> | 672.4054 | 671.3981 | 671.3966 | 2.24 | 0    | (29)  | 0.019  | 1    | K.TVSLPR.L |
| <input checked="" type="checkbox"/> <a href="#">1530</a> | 672.4055 | 671.3982 | 671.3966 | 2.37 | 0    | (28)  | 0.023  | 1    | K.TVSLPR.L |
| <input checked="" type="checkbox"/> <a href="#">1532</a> | 672.4060 | 671.3988 | 671.3966 | 3.19 | 0    | (28)  | 0.021  | 1    | K.TVSLPR.L |

Proteins matching the same set of peptides:

[gi|21214752](#) Mass: 206214 Score: 29 Queries matched: 5

gag-pol polyprotein precursor; hypothetical protein [Drosophila melanogaster]  
[gi|25009978](#) Mass: 83774 Score: 29 Queries matched: 5  
 GH06606p [Drosophila melanogaster]

6. [gi|17862878](#) Mass: 232888 Score: 28 Queries matched: 1 emPAI: 0.01  
 SD01389p [Drosophila melanogaster]

Check to include this hit in error tolerant search or archive report

| Query                                                    | Observed | Mr(expt) | Mr(calc) | ppm  | Miss | Score | Expect | Rank | Peptide    |
|----------------------------------------------------------|----------|----------|----------|------|------|-------|--------|------|------------|
| <input checked="" type="checkbox"/> <a href="#">1537</a> | 674.3734 | 673.3662 | 673.3646 | 2.26 | 0    | 28    | 0.027  | 1    | K.IDLADK.E |

Proteins matching the same set of peptides:

[gi|19527661](#) Mass: 141204 Score: 28 Queries matched: 1  
 SD03956p [Drosophila melanogaster]

[gi|24650843](#) Mass: 232920 Score: 28 Queries matched: 1  
 CG10011-PA [Drosophila melanogaster]

[gi|125773229](#) Mass: 229479 Score: 28 Queries matched: 1  
 GA10007-PA [Drosophila pseudoobscura]

7. [gi|8380](#) Mass: 29436 Score: 25 Queries matched: 1 emPAI: 0.11  
 unnamed protein product [Drosophila melanogaster]

Check to include this hit in error tolerant search or archive report

| Query                                                    | Observed | Mr(expt)  | Mr(calc)  | ppm  | Miss | Score | Expect | Rank | Peptide        |
|----------------------------------------------------------|----------|-----------|-----------|------|------|-------|--------|------|----------------|
| <input checked="" type="checkbox"/> <a href="#">1967</a> | 536.8000 | 1071.5855 | 1071.5812 | 4.03 | 0    | 25    | 0.031  | 1    | K.LLDSAIPSEK.I |

Proteins matching the same set of peptides:

[gi|17136420](#) Mass: 29393 Score: 25 Queries matched: 1  
 Proteasome 29kD subunit CG9327-PA [Drosophila melanogaster]

[gi|125811518](#) Mass: 29205 Score: 25 Queries matched: 1  
 GA21704-PA [Drosophila pseudoobscura]

8. [gi|24644950](#) Mass: 36839 Score: 25 Queries matched: 2  
 CG2767-PA [Drosophila melanogaster]

Check to include this hit in error tolerant search or archive report

| Query                                                    | Observed | Mr(expt)  | Mr(calc)  | ppm  | Miss | Score | Expect | Rank | Peptide       |
|----------------------------------------------------------|----------|-----------|-----------|------|------|-------|--------|------|---------------|
| <input checked="" type="checkbox"/> <a href="#">1957</a> | 523.2861 | 1044.5577 | 1044.5564 | 1.30 | 0    | 25    | 0.063  | 1    | K.LSSLDQNIR.I |
| <input checked="" type="checkbox"/> <a href="#">1959</a> | 523.2873 | 1044.5601 | 1044.5564 | 3.58 | 0    | (22)  | 0.14   | 1    | K.LSSLDQNIR.I |

Peptide matches not assigned to protein hits: (no details means no match)

| Query                                                    | Observed | Mr(expt)  | Mr(calc)  | ppm   | Miss | Score | Expect | Rank | Peptide              |
|----------------------------------------------------------|----------|-----------|-----------|-------|------|-------|--------|------|----------------------|
| <input checked="" type="checkbox"/> <a href="#">781</a>  | 499.2993 | 498.2920  | 498.2914  | 1.20  | 0    | 23    | 0.12   | 1    | GGIPR                |
| <input checked="" type="checkbox"/> <a href="#">782</a>  | 499.2996 | 498.2923  | 498.2914  | 1.72  | 0    | 23    | 0.13   | 1    | GGIPR                |
| <input checked="" type="checkbox"/> <a href="#">1300</a> | 603.3106 | 602.3034  | 602.3024  | 1.65  | 0    | 22    | 0.22   | 1    | DLEAR                |
| <input checked="" type="checkbox"/> <a href="#">1330</a> | 612.3845 | 611.3772  | 611.3755  | 2.80  | 0    | 21    | 0.1    | 1    | LNIPR                |
| <input checked="" type="checkbox"/> <a href="#">1170</a> | 571.3574 | 570.3501  | 570.3489  | 2.11  | 0    | 21    | 0.05   | 1    | VSIPR                |
| <input checked="" type="checkbox"/> <a href="#">1881</a> | 920.4873 | 919.4800  | 919.4763  | 4.05  | 1    | 21    | 0.18   | 1    | EKYPVER              |
| <input checked="" type="checkbox"/> <a href="#">1302</a> | 603.3113 | 602.3040  | 602.3024  | 2.77  | 0    | 21    | 0.32   | 1    | DLEAR                |
| <input checked="" type="checkbox"/> <a href="#">1809</a> | 423.2281 | 844.4416  | 844.4443  | -3.19 | 0    | 20    | 0.16   | 1    | SPALWGSK             |
| <input checked="" type="checkbox"/> <a href="#">1304</a> | 603.3116 | 602.3043  | 602.3024  | 3.16  | 0    | 20    | 0.37   | 1    | DLEAR                |
| <input checked="" type="checkbox"/> <a href="#">1650</a> | 725.4692 | 724.4620  | 724.4595  | 3.35  | 0    | 20    | 0.06   | 1    | LINLPR               |
| <input checked="" type="checkbox"/> <a href="#">1732</a> | 394.2197 | 786.4249  | 786.4236  | 1.66  | 0    | 19    | 0.19   | 1    | EVGDLVR              |
| <input checked="" type="checkbox"/> <a href="#">1895</a> | 466.7426 | 931.4706  | 931.4723  | -1.80 | 0    | 19    | 0.16   | 1    | INDSLQSR             |
| <input checked="" type="checkbox"/> <a href="#">2110</a> | 771.4011 | 2311.1815 | 2311.1736 | 3.44  | 1    | 19    | 0.23   | 1    | ALYLGDNDFEYIPKEVGQLK |
| <input checked="" type="checkbox"/> <a href="#">1382</a> | 628.3793 | 627.3721  | 627.3704  | 2.63  | 0    | 19    | 0.16   | 1    | GSVLPR               |
| <input checked="" type="checkbox"/> <a href="#">1605</a> | 702.3798 | 701.3725  | 701.3708  | 2.50  | 0    | 19    | 0.3    | 1    | VLDEAR               |
| <input checked="" type="checkbox"/> <a href="#">1890</a> | 928.5590 | 927.5518  | 927.5501  | 1.76  | 0    | 19    | 0.17   | 1    | ILNVSINR             |
| <input checked="" type="checkbox"/> <a href="#">1303</a> | 603.3114 | 602.3041  | 602.3024  | 2.92  | 0    | 19    | 0.49   | 1    | DLEAR                |
| <input checked="" type="checkbox"/> <a href="#">1168</a> | 571.3568 | 570.3495  | 570.3489  | 0.99  | 0    | 19    | 0.087  | 1    | VSIPR                |
| <input checked="" type="checkbox"/> <a href="#">1489</a> | 658.3905 | 657.3832  | 657.3810  | 3.46  | 0    | 18    | 0.44   | 1    | EAAIVR               |
| <input checked="" type="checkbox"/> <a href="#">1535</a> | 673.3908 | 672.3835  | 672.3806  | 4.32  | 0    | 18    | 0.27   | 1    | EVGQLK               |
| <input checked="" type="checkbox"/> <a href="#">1566</a> | 681.3808 | 680.3735  | 680.3718  | 2.54  | 0    | 18    | 0.062  | 1    | HLQAGR               |
| <input checked="" type="checkbox"/> <a href="#">1989</a> | 587.8335 | 1173.6525 | 1173.6506 | 1.62  | 0    | 18    | 0.18   | 1    | YVLPLGTQQR           |
| <input checked="" type="checkbox"/> <a href="#">922</a>  | 515.3309 | 514.3237  | 514.3227  | 1.81  | 0    | 17    | 0.83   | 1    | LGAVR                |
| <input checked="" type="checkbox"/> <a href="#">920</a>  | 515.3309 | 514.3236  | 514.3227  | 1.69  | 0    | 17    | 0.84   | 1    | LGAVR                |
